# Supplementary material for: Synthesis of Natural Homoisoflavonoids Having Either 5,7-Dihydroxy-6-methoxy or 7-Hydroxy-5,6-dimethoxy Groups
Source: PubMed Central journal article supplement (PMC5139345; doi:10.3390/molecules21081058), 2016-08-13
Supplement: NIHMS832092-supplement-Supplemental_Information.pdf [file NIHMS832092-supplement-Supplemental_Information.pdf]

# Supplementary Materials: Synthesis of Natural Homoisoflavonoids Having Either 5,7-Dihydroxy-6-methoxy or 7-Hydroxy-5,6-dimethoxy Groups

Hyungjun Lee, Yue Yuan, Inmoo Rhee, Timothy W. Corson and Seung-Yong Seo

Table S1. NMR comparison of natural and synthetic homoisoflavonoids (2-8).

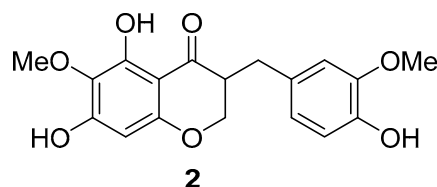

| Site | <sup>1</sup> H-NMR of | <sup>1</sup> H-NMR of | $\Delta(\delta_L - \delta_S)$ | <sup>13</sup> C-NMR of | <sup>13</sup> C-NMR of | $\Delta(\delta_L - \delta_S)$ |
|------|-----------------------|-----------------------|-------------------------------|------------------------|------------------------|-------------------------------|
|      | Lit. 2                | Synthetic 2           |                               | Lit. 2                 | Synthetic 2            |                               |
|      | CD <sub>3</sub> OD    | CD <sub>3</sub> OD    |                               | CD <sub>3</sub> OD     | CD <sub>3</sub> OD     |                               |
| 2H-1 | 4.08                  | 4.09                  | -0.01                         | 199.5                  | 199.9                  | -0.4                          |
| 2H-2 | 4.24                  | 4.25                  | -0.01                         | 160.8                  | 160.7                  | 0.1                           |
| 3H   | 2.83                  | 2.86                  | -0.03                         | 159.8                  | 159.8                  | 0                             |
| 5H   | 12.22                 | 12.2                  | 0.02                          | 156.7                  | 156.6                  | 0.1                           |
| 6H   | 3.77                  | 3.77                  | 0                             | 148.9                  | 148.8                  | 0.1                           |
| 8H   | 5.91                  | 5.9                   |                               | 146.1                  | 146                    | 0.1                           |
| 7H   | 10.5                  | *                     |                               | 130.8                  | 130.6                  | 0.2                           |
| 9H-1 | 2.66                  | 2.68                  | -0.02                         | 130.6                  | 130.2                  | 0.4                           |
| 9H-2 | 3.1                   | 3.12                  | -0.02                         | 122.7                  | 122.4                  | 0.3                           |
| 4'H  | 8.78                  | *                     |                               | 116.3                  | 116                    | 0.3                           |
| 2'H  | 6.8                   | 6.81                  | -0.01                         | 113.7                  | 113.3                  | 0.4                           |
| 3'H  | 3.83                  | 3.83                  | 0                             | 103                    | 102.6                  | 0.4                           |
| 5'H  | 6.73                  | 6.73                  | 0                             | 95.8                   | 95.6                   | 0.2                           |
| 6'H  | 6.65                  | 6.67                  | -0.02                         | 70.4                   | 70.1                   | 0.3                           |
|      |                       |                       |                               | 61                     | 60.7                   | 0.3                           |
|      |                       |                       |                               | 56.5                   | 56.1                   | 0.4                           |
|      |                       |                       |                               | 33.5                   | 33.2                   | 0.3                           |

(Lit.) *Phytochemistry* **1987**, *26*, 285–290. \* not detected.

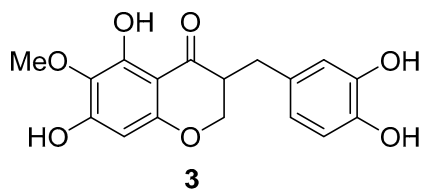

| Site | <sup>1</sup> H-NMR of | <sup>1</sup> H-NMR of | $\Delta(\delta_L - \delta_S)$ | <sup>13</sup> C-NMR of | <sup>13</sup> C-NMR of | $\Delta(\delta_L - \delta_S)$ |
|------|-----------------------|-----------------------|-------------------------------|------------------------|------------------------|-------------------------------|
|      | Lit. 3                | Synthetic 3           |                               | Lit. 3                 | Synthetic 3            |                               |
|      | CD <sub>3</sub> OD    |                       |                               | CD <sub>3</sub> OD     |                        |                               |
| 2H-1 | 4.08                  | 4.08                  | 0                             | 200.1                  | 200.2                  | -0.1                          |
| 2H-2 | 4.25                  | 4.24                  | 0.01                          | 160.9                  | 160.7                  | 0.2                           |
| 3H   | 2.79                  | 2.8                   | -0.01                         | 160.1                  | 160.1                  | 0                             |
| 5H   | 12.22                 | 12.2                  | 0.02                          | 156.8                  | 156.9                  | -0.1                          |
| 6H   | 3.8                   | 3.77                  | 0.03                          | 146.4                  | 146.4                  | 0                             |
| 8H   | 5.92                  | 5.91                  | 0.01                          | 145.1                  | 145.1                  | 0                             |
| 7H   | 10.66                 | *                     |                               | 130.9                  | 130.8                  | 0.1                           |
| 9H-1 | 2.6                   | 2.6                   | 0                             | 130.5                  | 130.4                  | 0.1                           |
| 9H-2 | 3.06                  | 3.05                  | 0.01                          | 121.5                  | 121.4                  | 0.1                           |
| 4'H  | 8.72                  | *                     |                               | 117.1                  | 117.1                  | 0                             |
| 2'H  | 6.7                   | 6.67                  | 0.03                          | 116.5                  | 116.4                  | 0.1                           |
| 3'H  | 8.79                  | *                     |                               | 102.9                  | 103                    | -0.1                          |
| 5'H  | 6.73                  | 6.71                  | 0.02                          | 95.8                   | 95.8                   | 0                             |
| 6'H  | 6.56                  | 6.55                  | 0.01                          | 70.2                   | 70.3                   | -0.1                          |
|      |                       |                       |                               | 61                     | 61                     | 0                             |
|      |                       |                       |                               | 33.2                   | 33.2                   | 0                             |

(Lit.) *Phytochemistry* **1987**, *26*, 285–290. \* not detected.

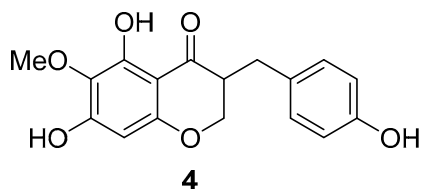

| Site | <sup>1</sup> H-NMR of | <sup>1</sup> H-NMR of | $\Delta(\delta_L - \delta_S)$ | <sup>13</sup> C-NMR of | <sup>13</sup> C-NMR of | $\Delta(\delta_L - \delta_S)$ |
|------|-----------------------|-----------------------|-------------------------------|------------------------|------------------------|-------------------------------|
|      | Lit. 4                | Synthetic 4           |                               | Lit. 4                 | Synthetic 4            |                               |
|      | CD <sub>3</sub> OD    |                       |                               | CD <sub>3</sub> OD     |                        |                               |
| 2H-1 | 4                     | 4                     | 0                             | 199.9                  | 199.9                  | 0                             |
| 2H-2 | 4.17                  | 4.2                   | -0.03                         | 161.1                  | 160.5                  | 0.6                           |
| 3H   | 2.75                  | 2.8                   | -0.05                         | 160                    | 159.8                  | 0.2                           |
| 5H   |                       |                       |                               | 157.1                  | 156.9                  | 0.2                           |
| 6H   | 3.76                  | 3.7                   | 0.06                          | 156.7                  | 156.5                  | 0.2                           |
| 8H   | 5.89                  | 5.9                   | -0.01                         | 131                    | 130.8                  | 0.2                           |
| 7H   |                       |                       |                               | 130.4                  | 130.1                  | 0.3                           |
| 9H-1 | 2.59                  | 2.6                   | -0.01                         | 130                    | 129.8                  | 0.2                           |
| 9H-2 | 3.07                  | 3.1                   | -0.03                         | 116.3                  | 116.1                  | 0.2                           |
| 4'H  |                       |                       |                               | 102.7                  | 102.6                  | 0.1                           |
| 2'H  | 7.02                  | 7                     | 0.02                          | 95.9                   | 95.5                   | 0.4                           |
| 3'H  |                       |                       |                               | 70.2                   | 69.9                   | 0.3                           |
| 5'H  | 6.72                  | 6.7                   | 0.02                          | 60.9                   | 60.6                   | 0.3                           |
| 6'H  |                       |                       |                               | 49.1                   | 47.8                   | 1.3                           |
|      |                       |                       |                               | 32.9                   | 32.7                   | 0.2                           |

(Lit.) *Phytochemistry* **1987**, *26*, 285–290.

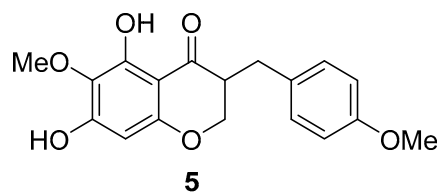

| Site | <sup>1</sup> H-NMR of | <sup>1</sup> H-NMR of | $\Delta(\delta_L - \delta_S)$ | <sup>13</sup> C-NMR of | <sup>13</sup> C-NMR of | $\Delta(\delta_L - \delta_S)$ |
|------|-----------------------|-----------------------|-------------------------------|------------------------|------------------------|-------------------------------|
|      | Lit. 5                | Synthetic 5           |                               | Lit. 5                 | Synthetic 5            |                               |
|      | CD <sub>3</sub> OD    |                       |                               | CD <sub>3</sub> OD     |                        |                               |
| 2H-1 | 4.1                   | 4.06                  | 0.04                          | 200.1                  | 200.1                  | 0                             |
| 2H-2 | 4.27                  | 4.23                  | 0.04                          | 160.7                  | 160.7                  | 0                             |
| 3H   | 2.85                  | 2.84                  | 0.01                          | 160.1                  | 160.1                  | 0                             |
| 5H   |                       |                       |                               | 160                    | 160                    | 0                             |
| 6H   | 3.81                  | 3.76                  | 0.05                          | 156.5                  | 156.9                  | -0.4                          |
| 8H   | 5.95                  | 5.9                   | 0.05                          | 131.4                  | 131.4                  | 0                             |
| 7H   |                       |                       |                               | 131.4                  | 131.2                  | 0.2                           |
| 9H-1 | 2.73                  | 2.7                   | 0.03                          | 131.2                  | 130.4                  | 0.8                           |
| 9H-2 | 3.26                  | 3.13                  | 0.13                          | 115.1                  | 115.1                  | 0                             |
| 4'H  |                       |                       |                               | 103                    | 103                    | 0                             |
| 2'H  | 7.19                  | 7.15                  | 0.04                          | 95.8                   | 95.8                   | 0                             |
| 3'H  | 3.81                  | 3.77                  | 0.04                          | 70.3                   | 70.3                   | 0                             |
| 5'H  | 6.91                  | 6.86                  | 0.05                          | 61                     | 61                     | 0                             |
| 6'H  |                       |                       |                               | 55.7                   | 55.7                   | 0                             |
|      |                       |                       |                               | 32.9                   | 32.9                   | 0                             |

(Lit.) *Phytochemistry* 1999, 51, 943–946.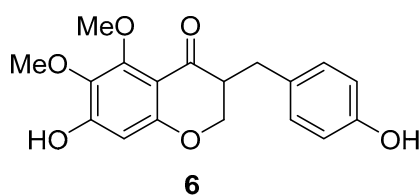

| Site | <sup>1</sup> H-NMR of | <sup>1</sup> H-NMR of | $\Delta(\delta_L - \delta_S)$ | <sup>13</sup> C-NMR of | <sup>13</sup> C-NMR of | $\Delta(\delta_L - \delta_S)$ |
|------|-----------------------|-----------------------|-------------------------------|------------------------|------------------------|-------------------------------|
|      | Lit. 6                | Synthetic 6           |                               | Lit. 6                 | Synthetic 6            |                               |
|      | CDCl <sub>3</sub>     |                       |                               | CDCl <sub>3</sub>      |                        |                               |
| 2H-1 | 4.04                  | 4.0                   | 0.04                          | 191.5                  | 191.7                  | -0.2                          |
| 2H-2 | 4.23                  | 4.2                   | 0.03                          | 159.8                  | 159.8                  | 0                             |
| 3H   | 2.68                  | 2.7                   | -0.02                         | 155.5                  | 155.6                  | -0.1                          |
| 5H   | 3.9                   | 3.9                   |                               | 154.1                  | 154.3                  | -0.2                          |
| 6H   | 3.9                   | 3.9                   |                               | 153.4                  | 153.5                  | -0.1                          |
| 8H   | 6.28                  | 6.3                   | -0.02                         | 135.2                  | 135.2                  | 0                             |
| 7H   |                       |                       |                               | 130.5                  | 130.3                  | 0.2                           |
| 9H-1 | 2.62                  | 2.6                   | 0.02                          | 130.3                  | 130.3                  | 0                             |
| 9H-2 | 3.13                  | 3.1                   | 0.03                          | 115.4                  | 115.4                  | 0                             |
| 4'H  |                       |                       |                               | 108.7                  | 108.6                  | 0.1                           |
| 2'H  | 7.07                  | 7.0                   | 0.07                          | 98.8                   | 98.8                   | 0                             |
| 3'H  | 6.75                  | 6.7                   | 0.05                          | 68.8                   | 68.8                   | 0                             |
| 5'H  | 6.75                  | 6.7                   | 0.05                          | 61.5                   | 61.5                   | 0                             |
| 6'H  | 7.07                  | 7.0                   | 0.07                          | 61.4                   | 61.4                   | 0                             |
|      |                       |                       |                               | 48.5                   | 48.5                   | 0                             |
|      |                       |                       |                               | 31.9                   | 32                     | -0.1                          |

(Lit.) *Biochemical Systematics and Ecology* 2006, 34, 114–118.

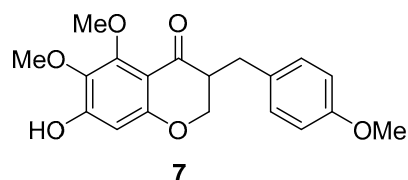

| Site | <sup>1</sup> H-NMR of                                   | <sup>1</sup> H-NMR of | $\Delta(\delta_L - \delta_S)$ | <sup>13</sup> C-NMR of                                   | <sup>13</sup> C-NMR of | $\Delta(\delta_L - \delta_S)$ |
|------|---------------------------------------------------------|-----------------------|-------------------------------|----------------------------------------------------------|------------------------|-------------------------------|
|      | Lit. 7                                                  | Synthetic 7           |                               | Lit. 7                                                   | Synthetic 7            |                               |
|      | <sup>1</sup> H-NMR of CD <sub>3</sub> COCD <sub>3</sub> |                       |                               | <sup>13</sup> C-NMR of CD <sub>3</sub> COCD <sub>3</sub> |                        |                               |
| 2H-1 | 4.15                                                    | 4.14                  | 0.01                          | 190                                                      | 190                    | 0                             |
| 2H-2 | 3.95                                                    | 3.94                  | 0.01                          | 159.5                                                    | 159.6                  | -0.1                          |
| 3H   | 2.62                                                    | 2.62                  | 0                             | 158.4                                                    | 158.5                  | -0.1                          |
| 5H   |                                                         |                       |                               | 157.6                                                    | 157.1                  | 0.5                           |
| 6H   |                                                         |                       |                               | 154.6                                                    | 154.7                  | -0.1                          |
| 8H   | 6.09                                                    | 6.09                  | 0                             | 136.4                                                    | 136.3                  | 0.1                           |
| 7H   |                                                         |                       |                               | 130.7                                                    | 130.8                  | -0.1                          |
| 9H-1 | 3.01                                                    | 3                     | 0.01                          | 130                                                      | 130.1                  | -0.1                          |
| 9H-2 | 2.59                                                    | 2.58                  | 0.01                          | 113.8                                                    | 113.9                  | -0.1                          |
| 4'H  | 3.64                                                    | 3.64                  | 0                             | 108                                                      | 108.5                  | -0.5                          |
| 2'H  | 7.07                                                    | 7.07                  | 0                             | 99.1                                                     | 99.1                   | 0                             |
| 3'H  | 6.76                                                    | 6.75                  | 0.01                          | 68.9                                                     | 69.1                   | -0.2                          |
| 5'H  | 3.69                                                    | 3.71                  | -0.02                         | 60.7                                                     | 60.8                   | -0.1                          |
| 6'H  | 3.63                                                    | 3.64                  | -0.01                         | 60.4                                                     | 60.6                   | -0.2                          |
|      |                                                         |                       |                               | 54.5                                                     | 54.6                   | -0.1                          |
|      |                                                         |                       |                               | 48.2                                                     | 48.3                   | -0.1                          |
|      |                                                         |                       |                               | 31.5                                                     | 31.5                   | 0                             |

(Lit.) *Phytochemistry Letters* 2012, 5, 591–595.

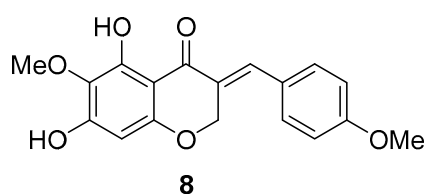

| Site | <sup>1</sup> H-NMR of                   | <sup>1</sup> H-NMR of | $\Delta(\delta_L - \delta_S)$ | <sup>13</sup> C-NMR of                   | <sup>13</sup> C-NMR of | $\Delta(\delta_L - \delta_S)$ |
|------|-----------------------------------------|-----------------------|-------------------------------|------------------------------------------|------------------------|-------------------------------|
|      | Lit. 8                                  | Synthetic 8           |                               | Lit. 8                                   | Synthetic 8            |                               |
|      | <sup>1</sup> H-NMR of CDCl <sub>3</sub> |                       |                               | <sup>13</sup> C-NMR of CDCl <sub>3</sub> |                        |                               |
| 2H-1 | 5.28                                    | 5.28                  | 0                             | 186.2                                    | 186.2                  | 0                             |
| 2H-2 | 5.28                                    | 5.28                  |                               | 161.1                                    | 161.1                  | 0                             |
| 3H   |                                         |                       |                               | 158.1                                    | 158.1                  | 0                             |
| 5H   |                                         |                       |                               | 157.5                                    | 157.5                  | 0                             |
| 6H   | 3.94                                    | 3.95                  | -0.01                         | 155.5                                    | 155.5                  | 0                             |
| 8H   | 6.03                                    | 6.03                  | 0                             | 137.5                                    | 137.5                  | 0                             |
| 7H   |                                         |                       |                               | 132.3                                    | 132.3                  | 0                             |
| 9H-1 | 7.8                                     | 7.8                   | 0                             | 128.7                                    | 128.7                  | 0                             |
| 9H-2 |                                         |                       |                               | 127.6                                    | 127.7                  | -0.1                          |
| 4'H  | 3.86                                    | 3.86                  | 0                             | 126.9                                    | 127                    | -0.1                          |
| 2'H  | 7.25                                    | 7.27                  | -0.02                         | 114.5                                    | 114.6                  | -0.1                          |
| 3'H  | 6.97                                    | 6.97                  | 0                             | 103.6                                    | 103.6                  | 0                             |
| 5'H  |                                         |                       |                               | 94.3                                     | 94.3                   | 0                             |
| 6'H  |                                         |                       |                               | 67.7                                     | 67.7                   | 0                             |
|      |                                         |                       |                               | 61.2                                     | 61.2                   | 0                             |
|      |                                         |                       |                               | 55.7                                     | 55.7                   | 0                             |

(Lit.) *Phytochemistry* 1999, 52, 947–955.

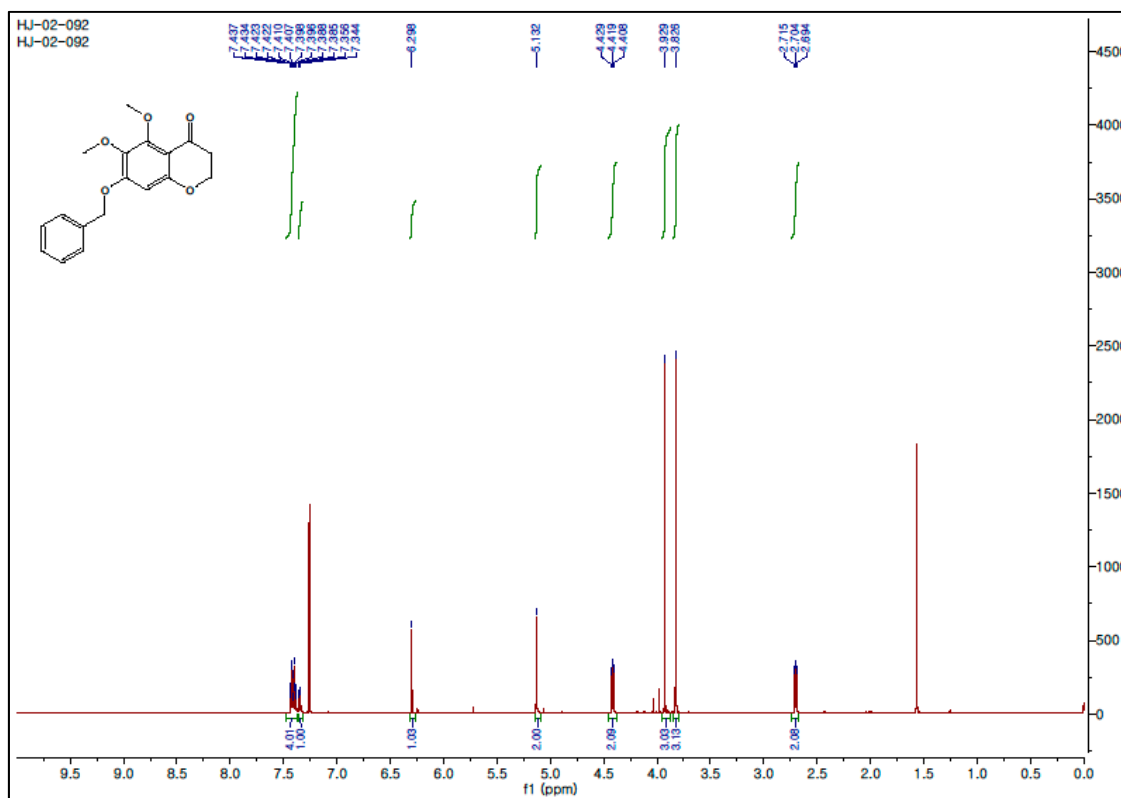Figure S1. <sup>1</sup>H-NMR (CDCl<sub>3</sub>, 600 MHz) of compound 16.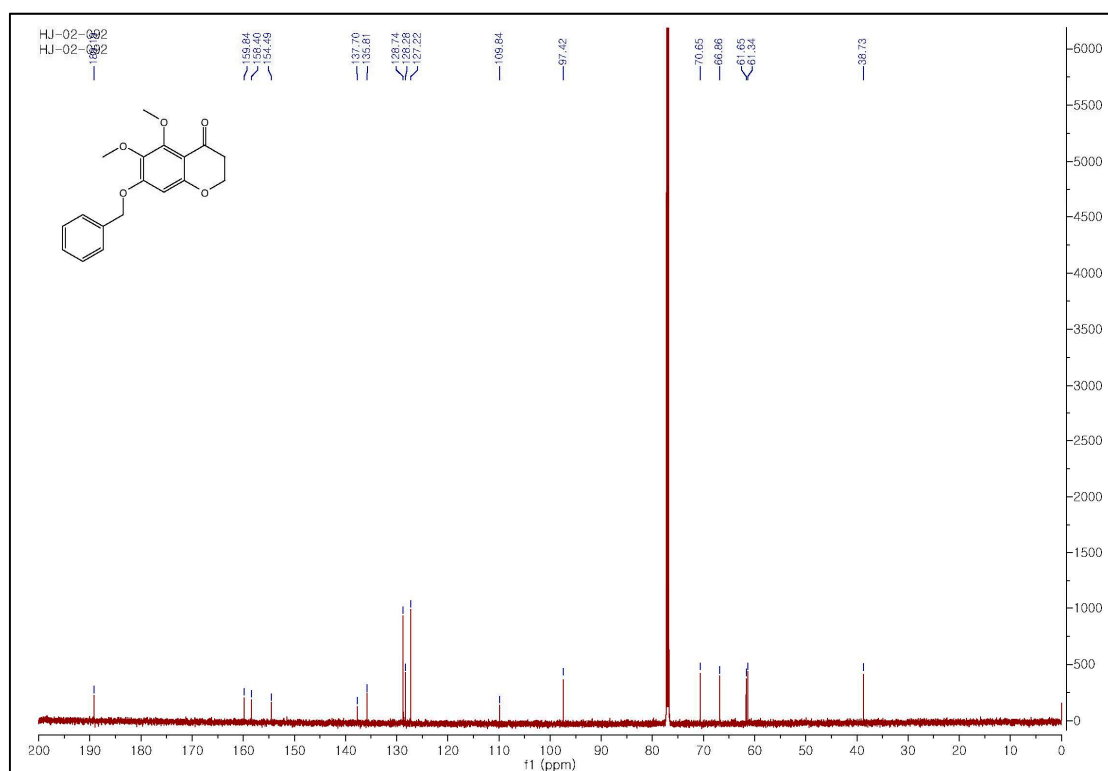Figure S2. <sup>13</sup>C-NMR (150 MHz, CDCl<sub>3</sub>) of compound 16.

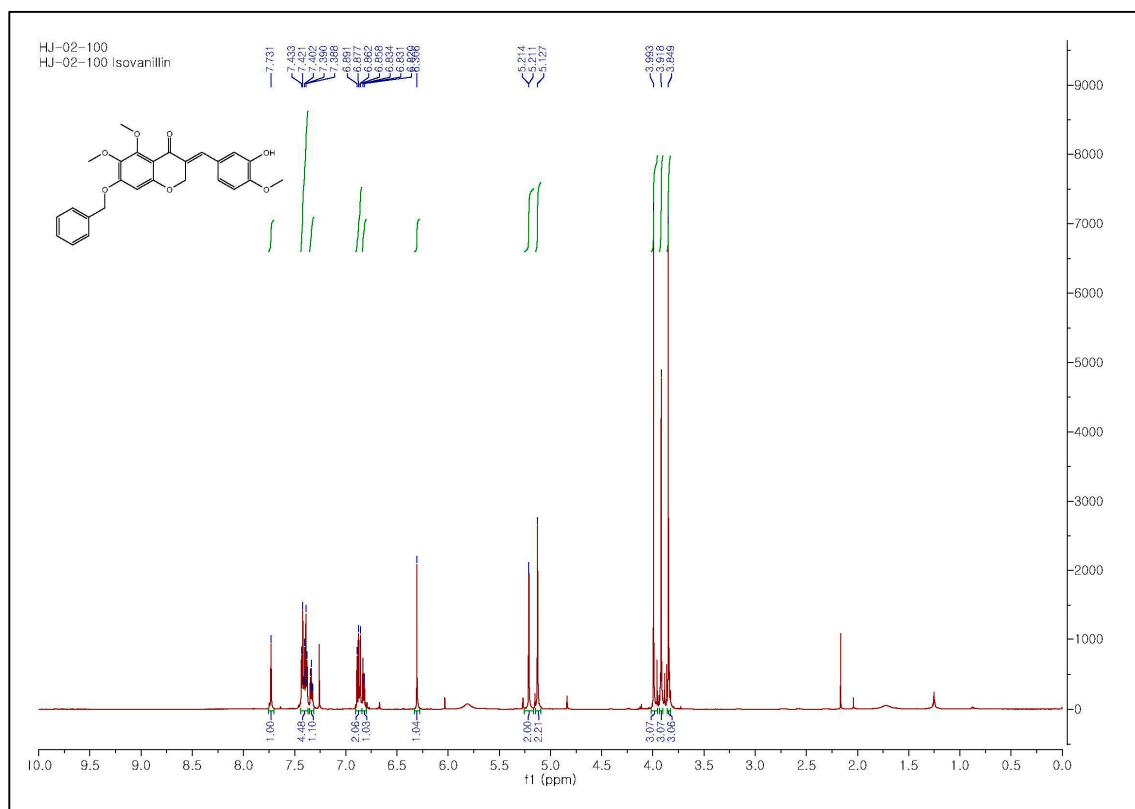

Figure S3.  $^1\text{H-NMR}$  ( $\text{CDCl}_3$ , 600 MHz) of compound 18a.

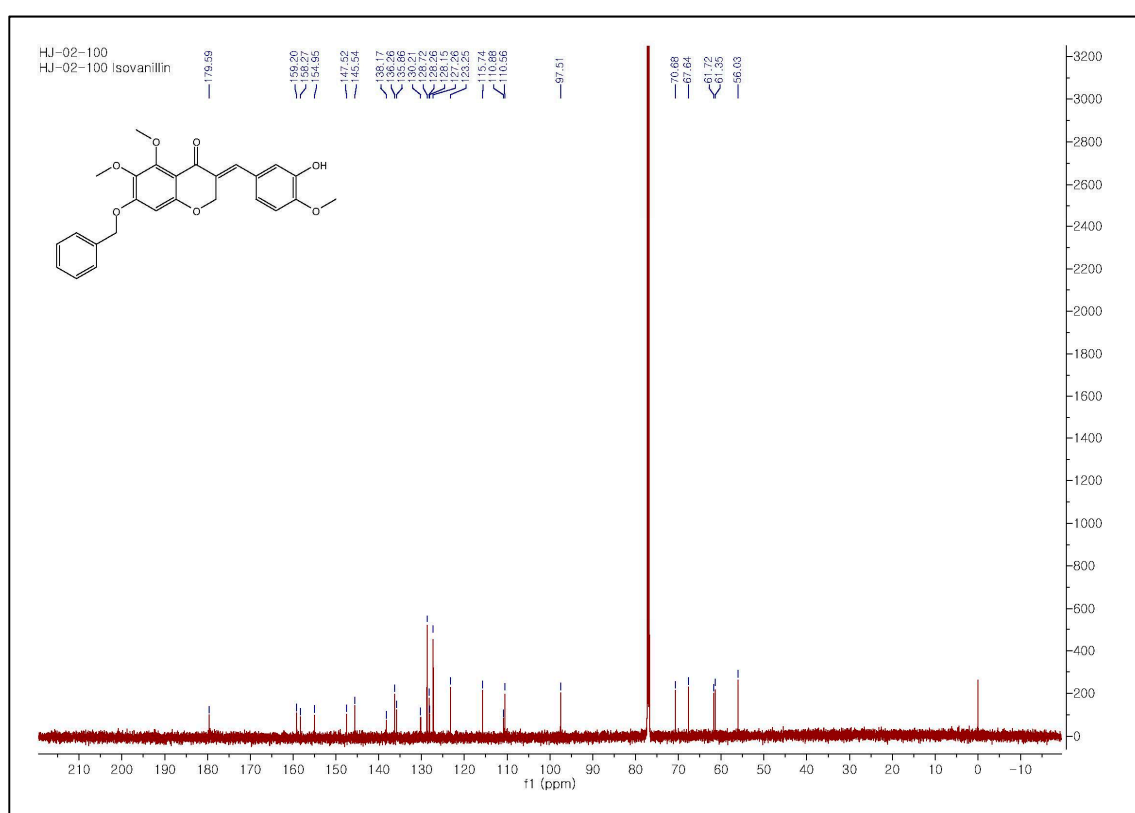

Figure S4.  $^{13}\text{C-NMR}$  (150 MHz,  $\text{CDCl}_3$ ) of compound 18a.

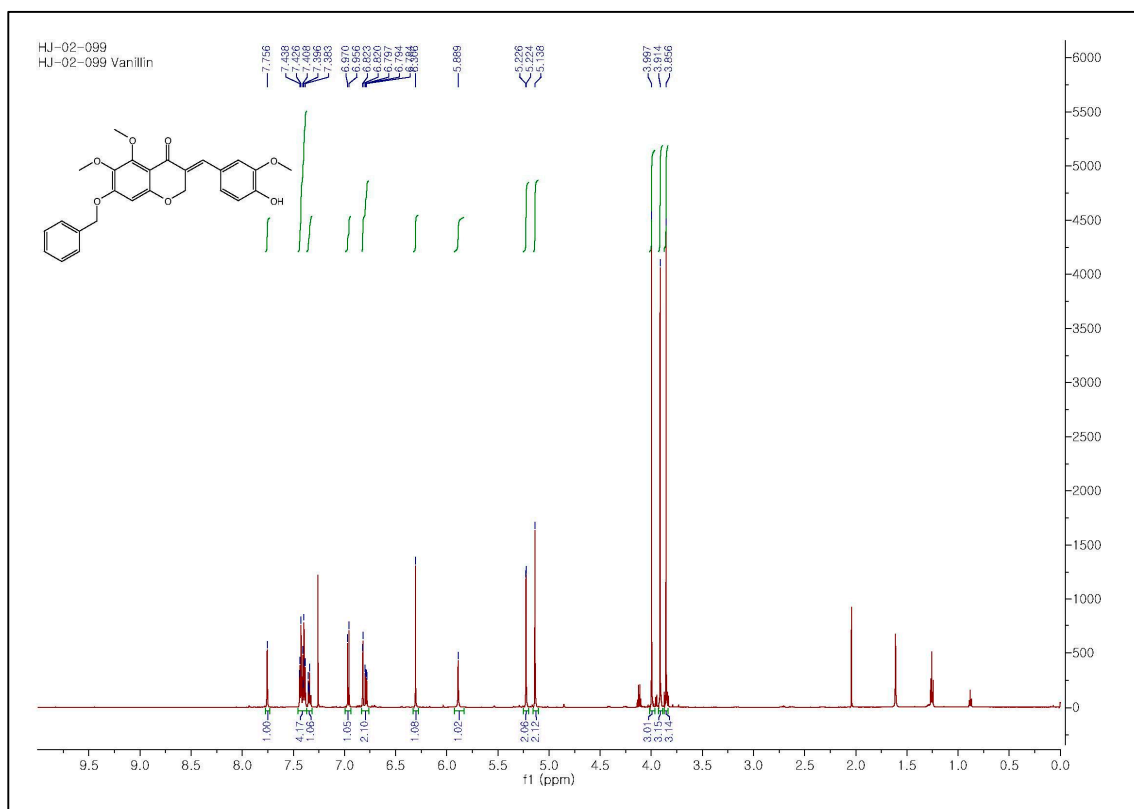

**Figure S5.** <sup>1</sup>H-NMR (CDCl<sub>3</sub>, 600 MHz) of compound **18b**.

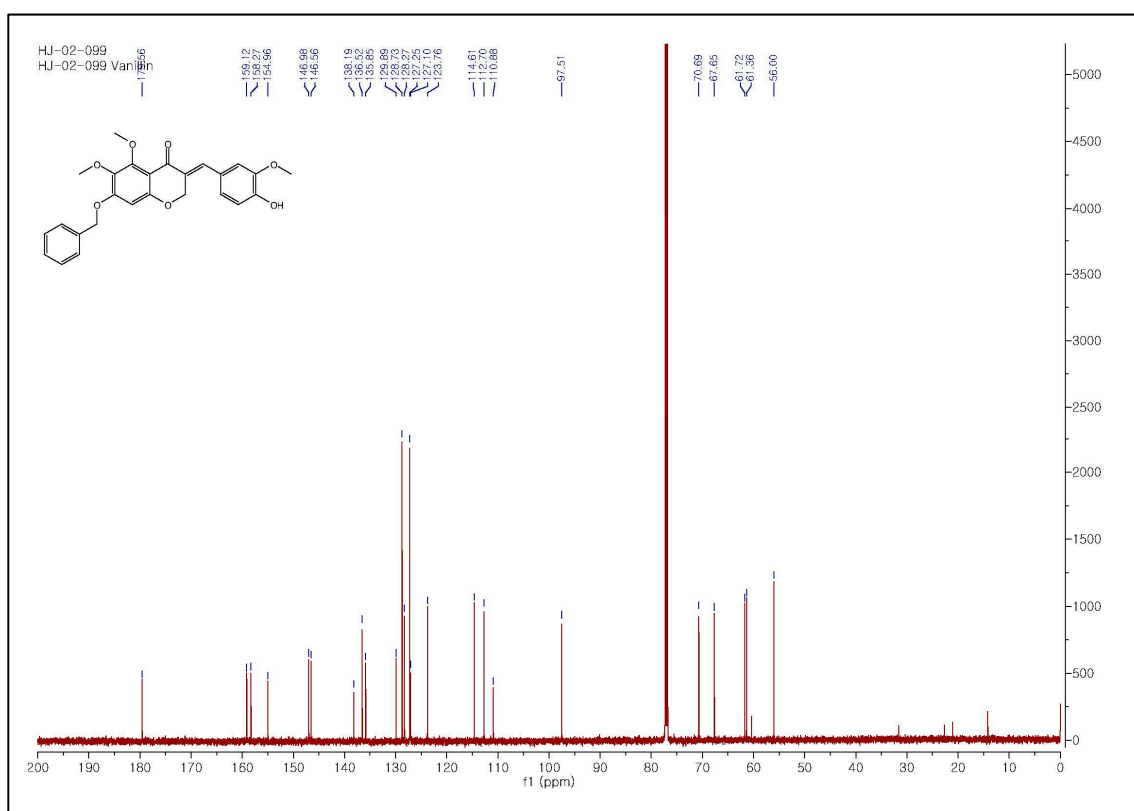

**Figure S6.** <sup>13</sup>C-NMR (150 MHz, CDCl<sub>3</sub>) of compound **18b**.

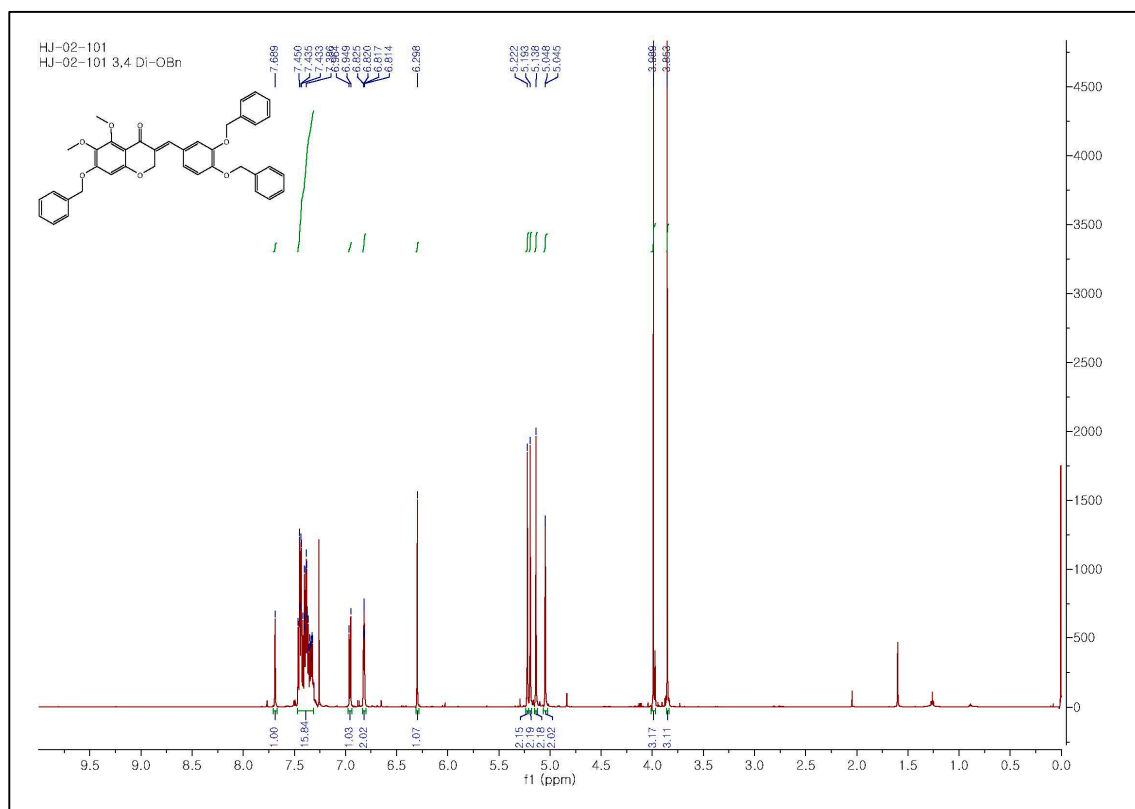

Figure S7.  $^1\text{H-NMR}$  ( $\text{CDCl}_3$ , 600 MHz) of compound 18c.

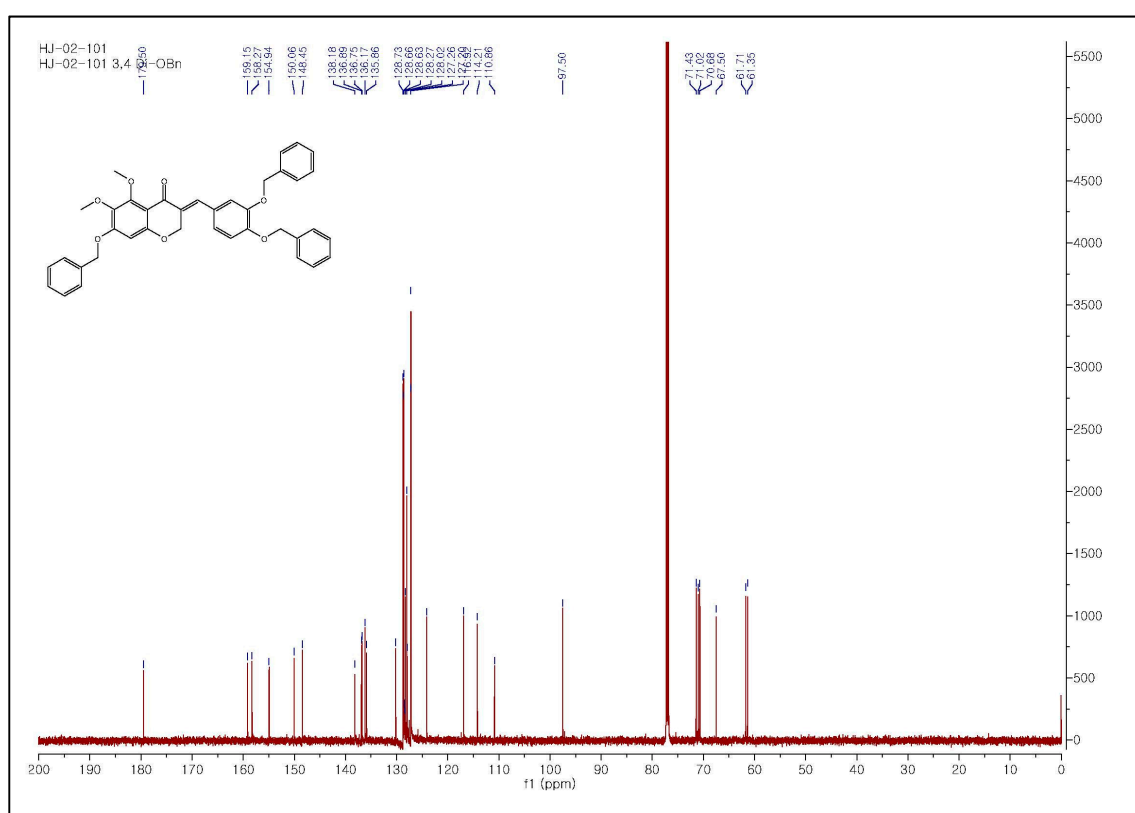

Figure S8.  $^{13}\text{C-NMR}$  (150 MHz,  $\text{CDCl}_3$ ) of compound 18c.



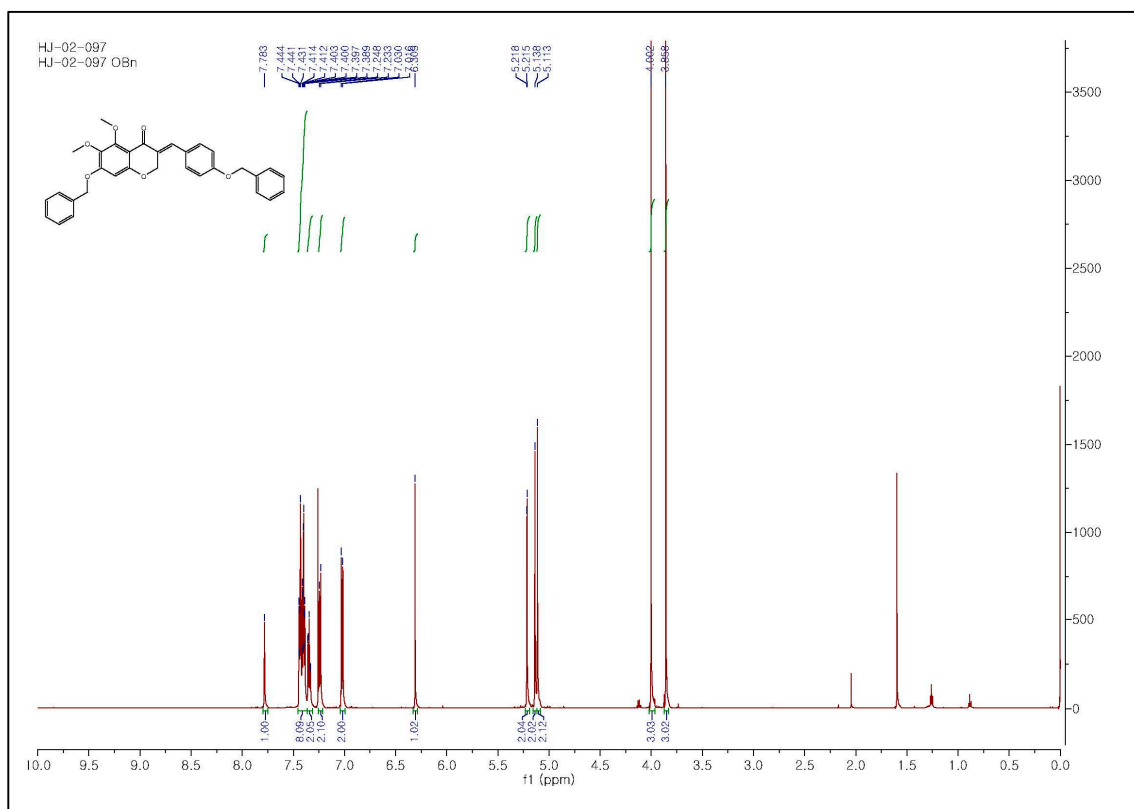

**Figure S9.** <sup>1</sup>H-NMR (CDCl<sub>3</sub>, 600 MHz) of compound 18d.

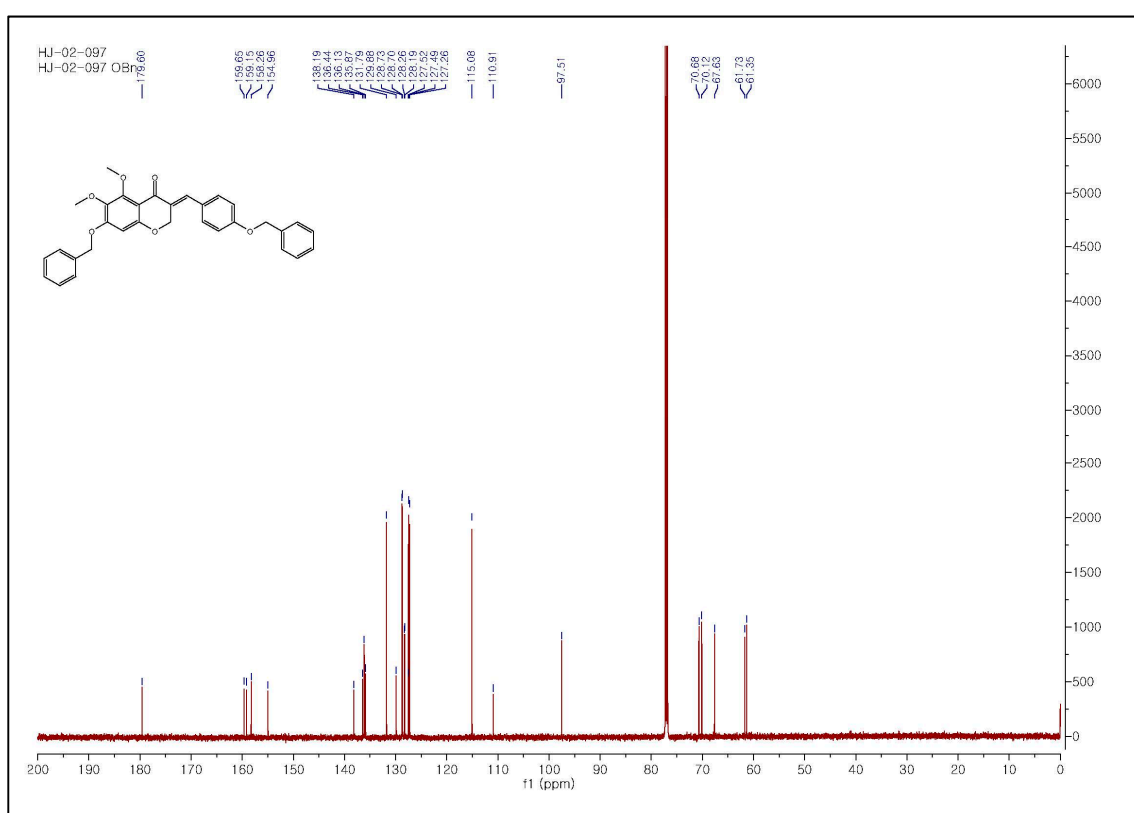

**Figure S10.** <sup>13</sup>C-NMR (150 MHz, CDCl<sub>3</sub>) of compound 18d.

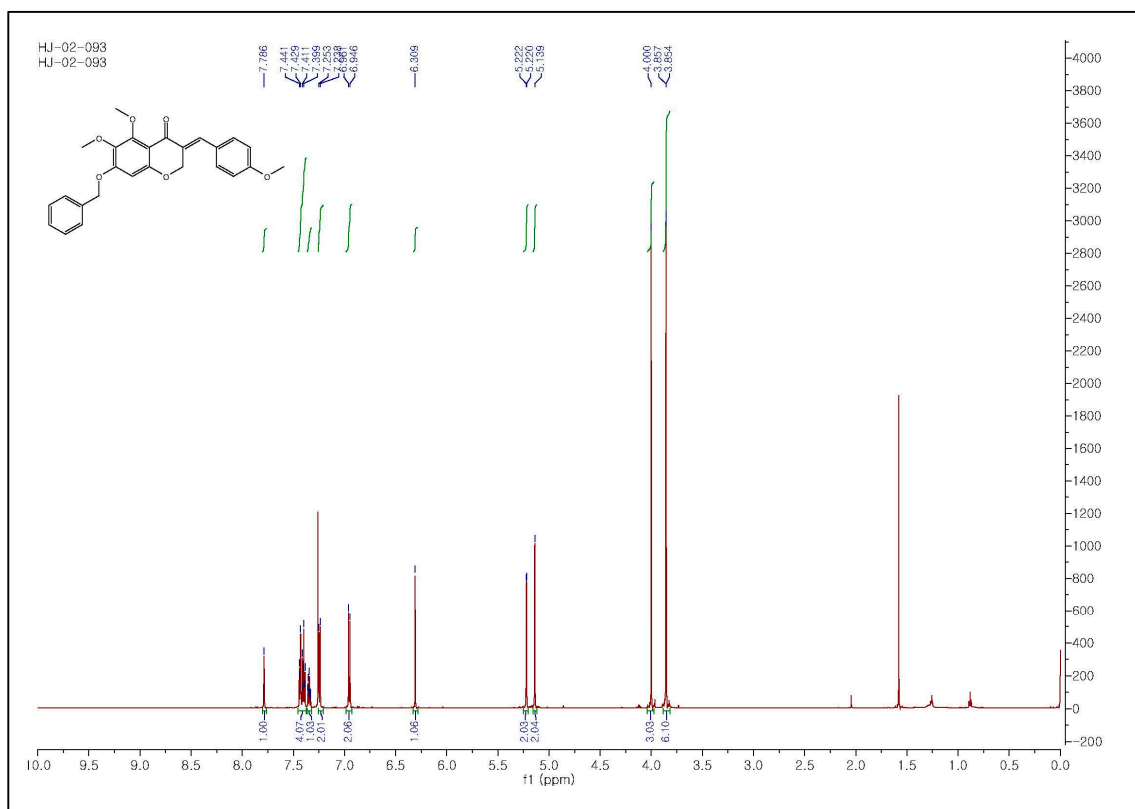Figure S11.  $^1\text{H-NMR}$  ( $\text{CDCl}_3$ , 600 MHz) of compound 18e.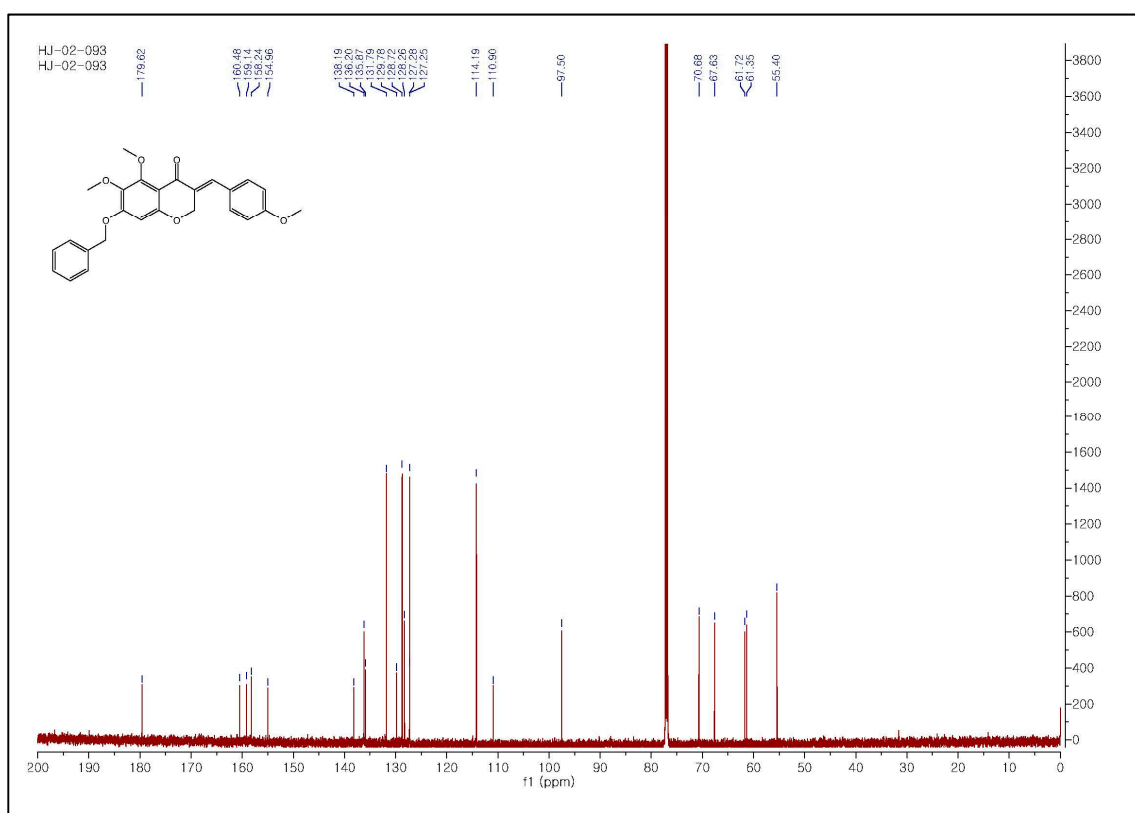Figure S12.  $^{13}\text{C-NMR}$  (150 MHz,  $\text{CDCl}_3$ ) of compound 18e.

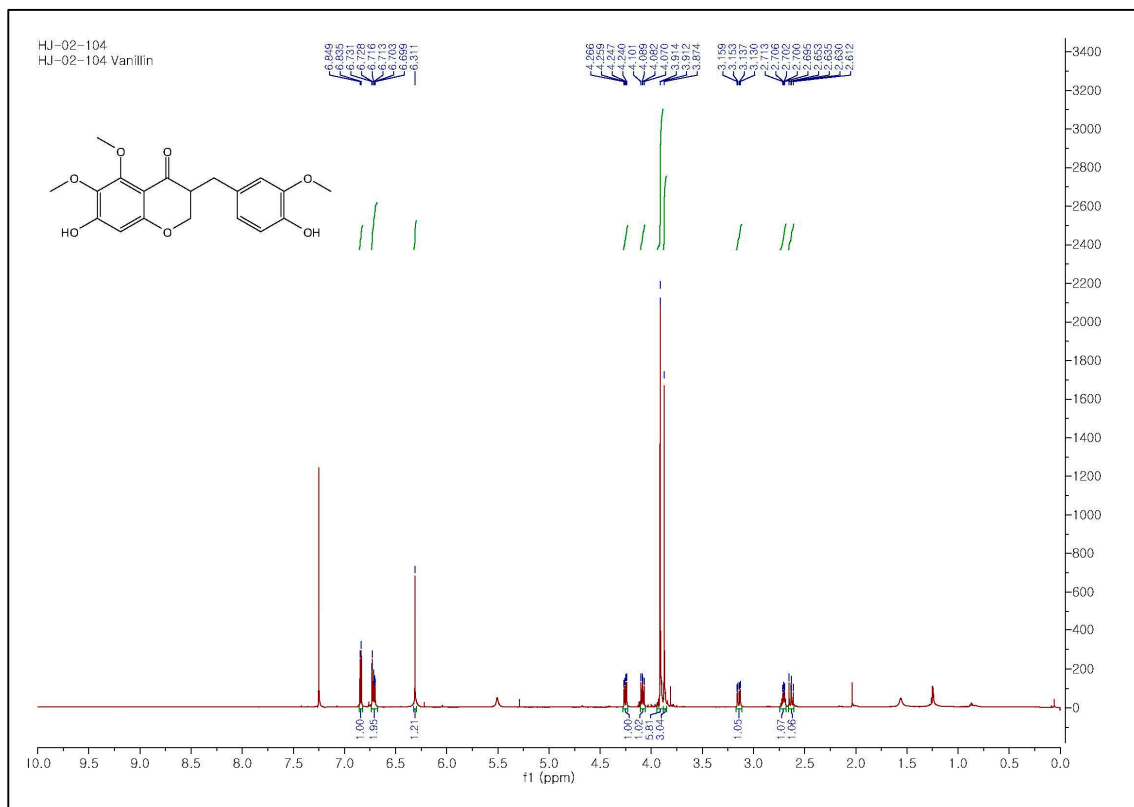Figure S13.  $^1\text{H-NMR}$  ( $\text{CDCl}_3$ , 600 MHz) of compound 15b.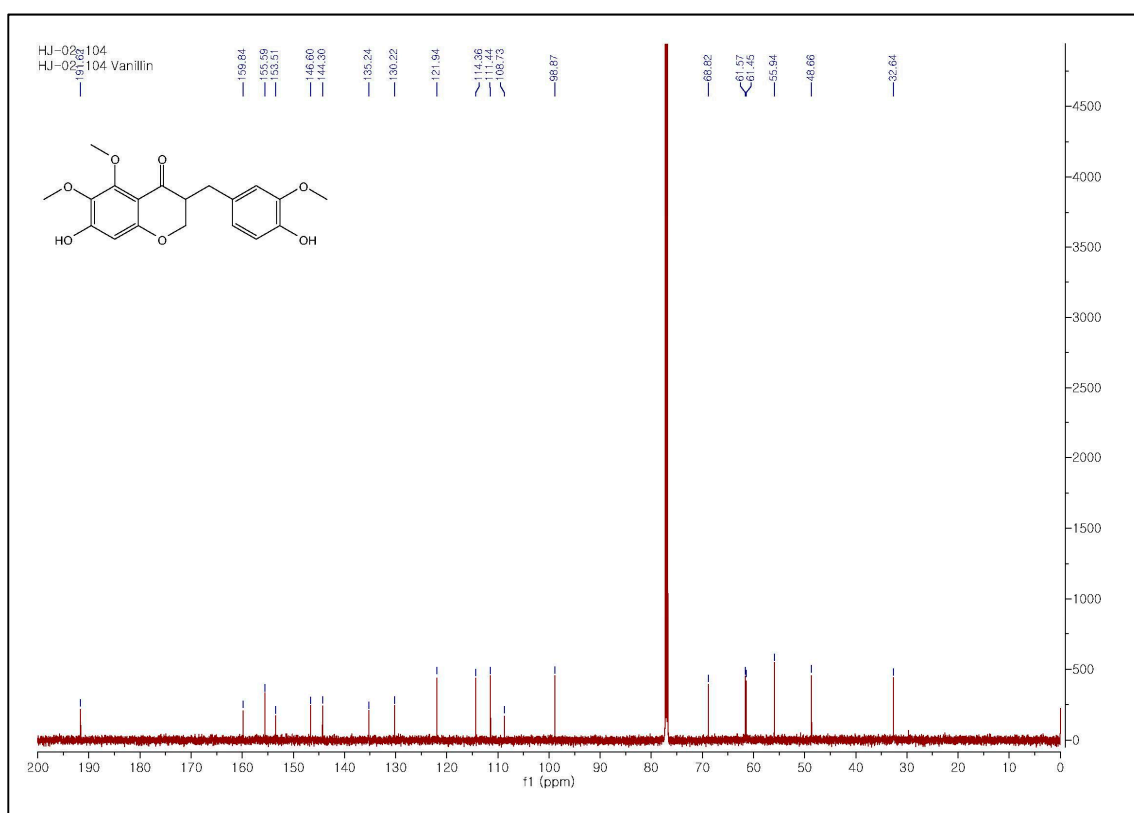Figure S14.  $^{13}\text{C-NMR}$  (150 MHz,  $\text{CDCl}_3$ ) of compound 15b.

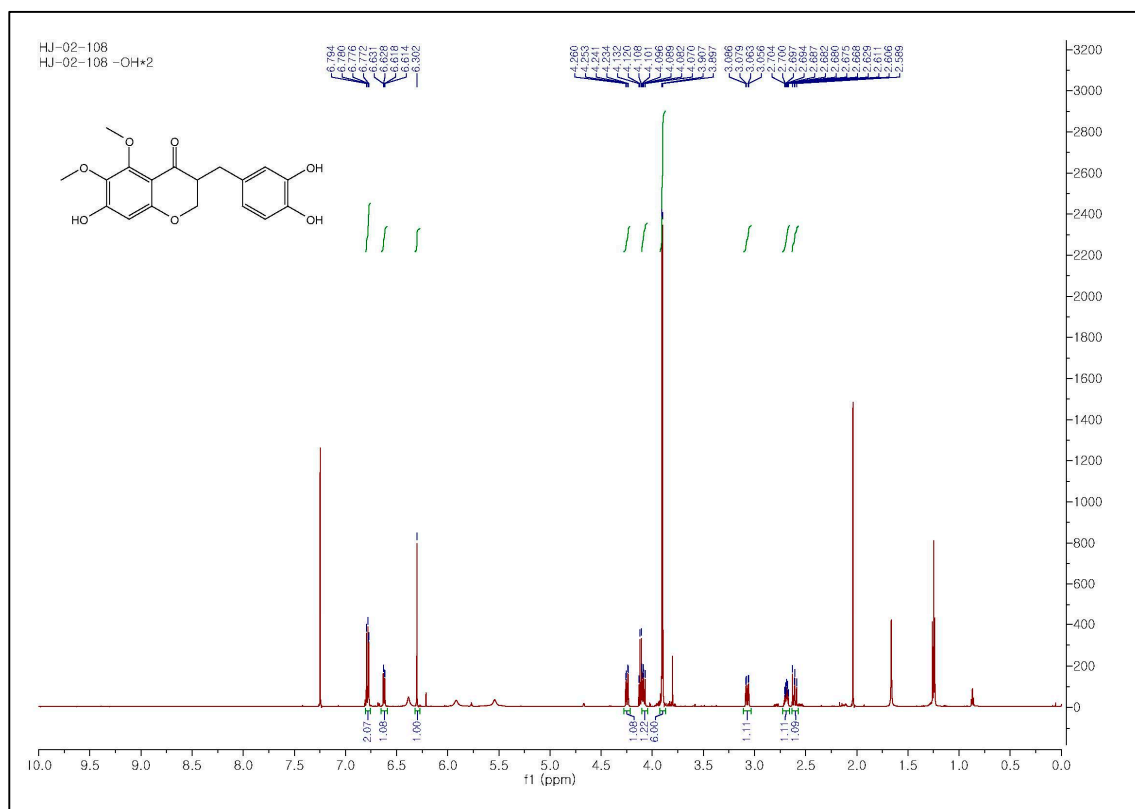Figure S15.  $^1\text{H-NMR}$  ( $\text{CDCl}_3$ , 600 MHz) of compound 15c.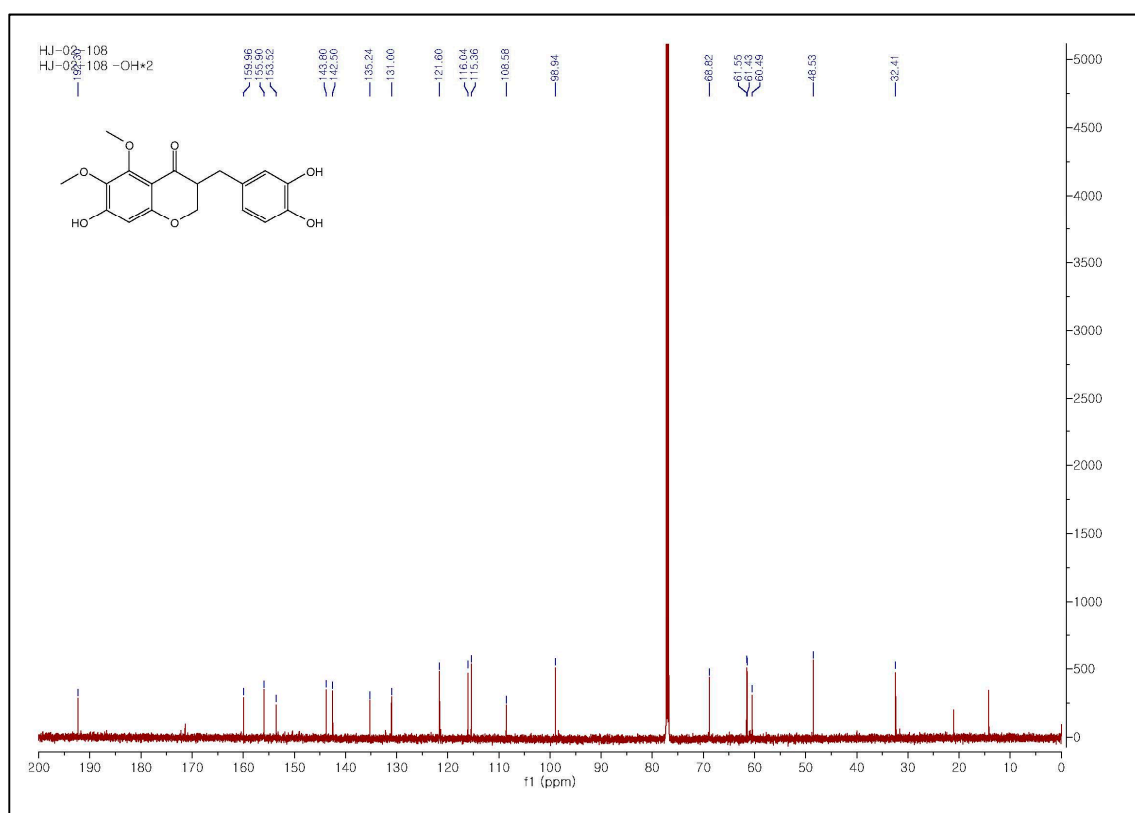Figure S16.  $^{13}\text{C-NMR}$  (150 MHz,  $\text{CDCl}_3$ ) of compound 15c.



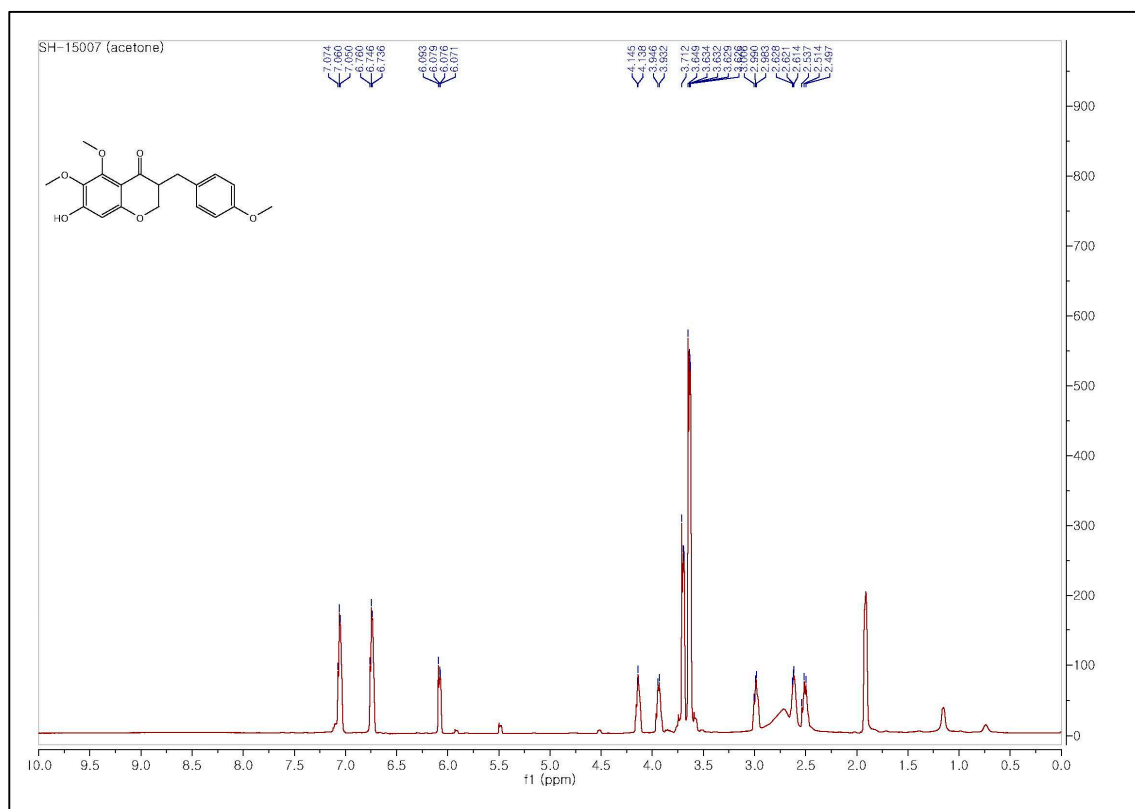

Figure S19.  $^1\text{H-NMR}$  (600 MHz,  $\text{CD}_3\text{COCD}_3$ ) of compound 7.

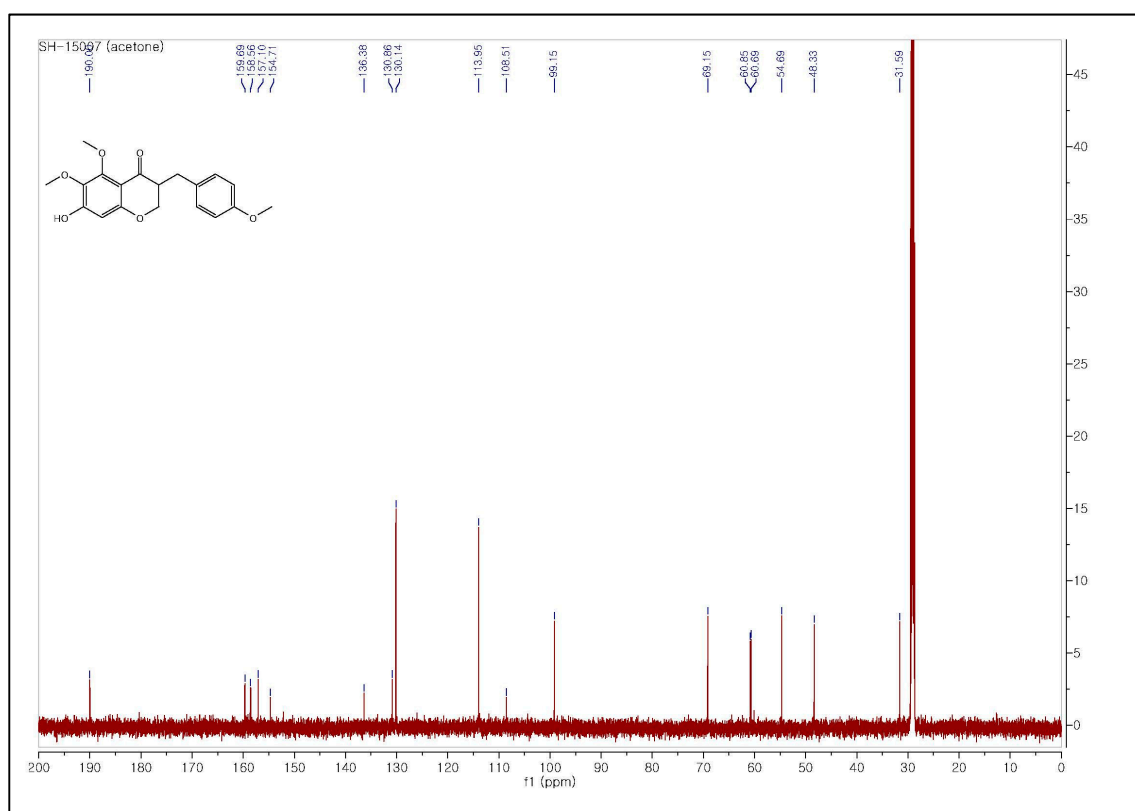

Figure S20.  $^{13}\text{C-NMR}$  (150 MHz,  $\text{CDCl}_3$ ) of compound 7.

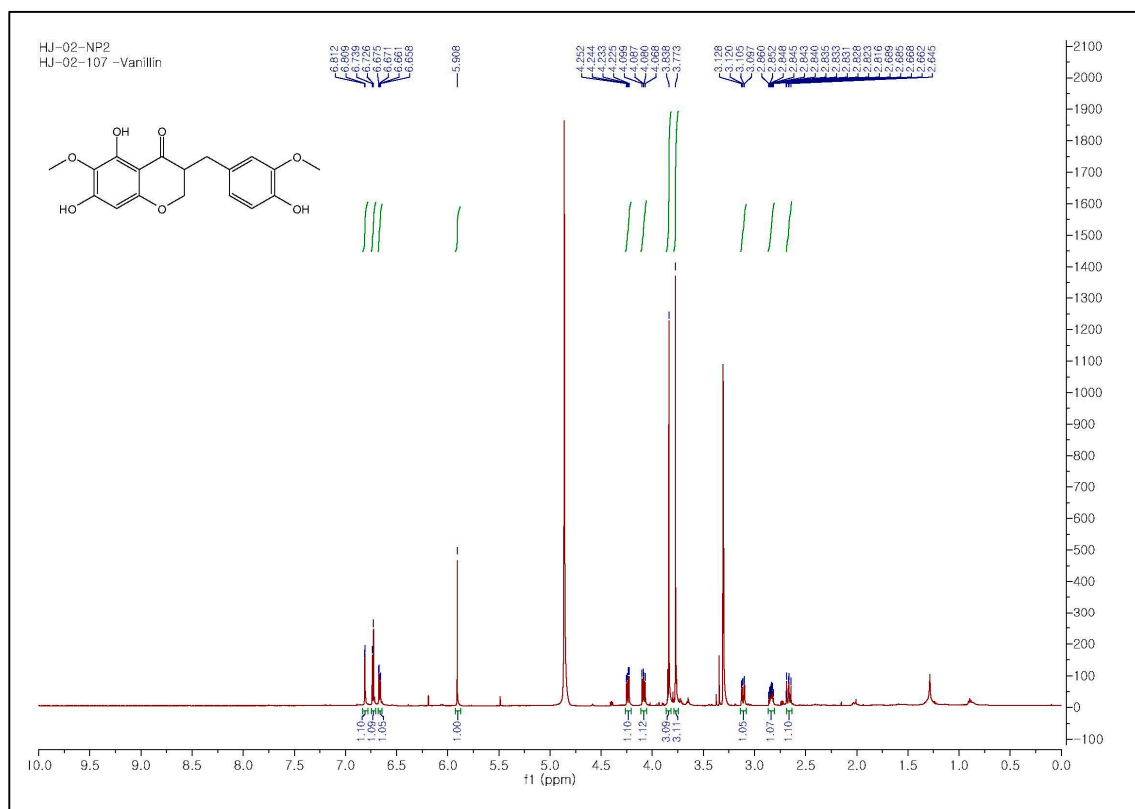Figure S21.  $^1\text{H-NMR}$  (600 MHz,  $\text{CD}_3\text{OD}$ ) of compound 2.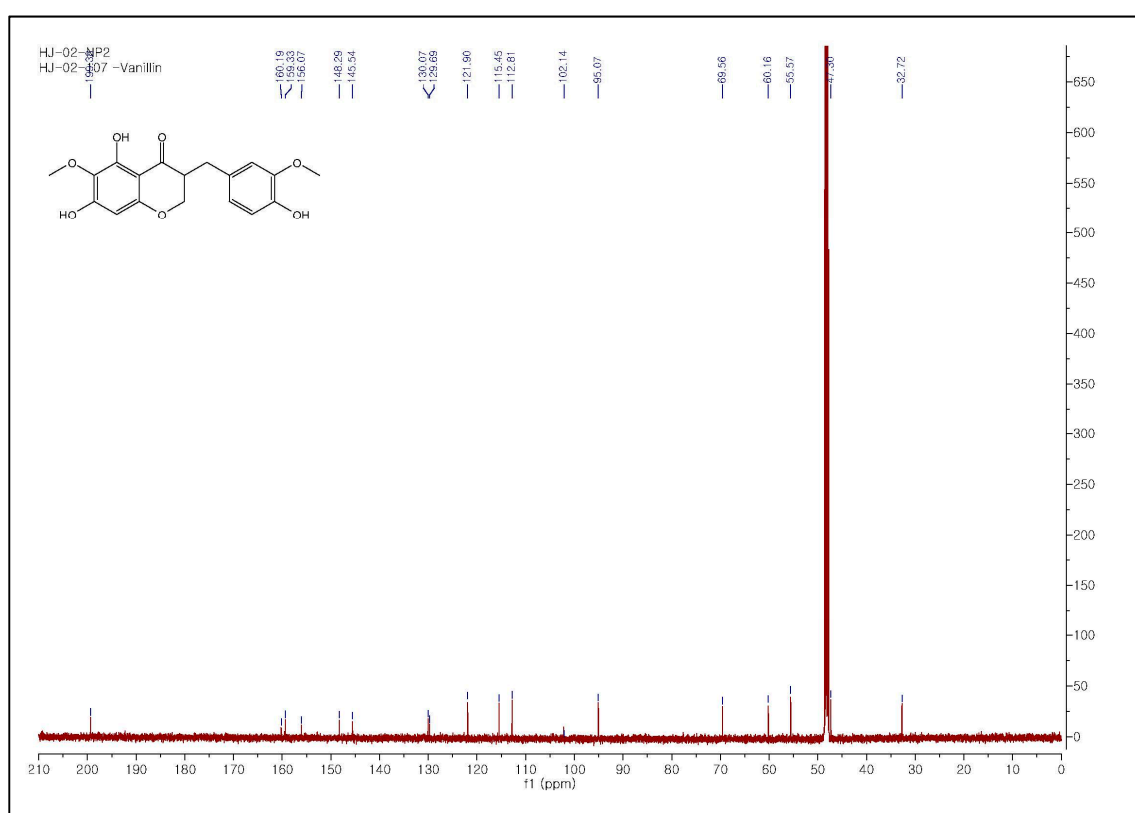Figure S22.  $^{13}\text{C-NMR}$  (150 MHz,  $\text{CD}_3\text{OD}$ ) of compound 2.

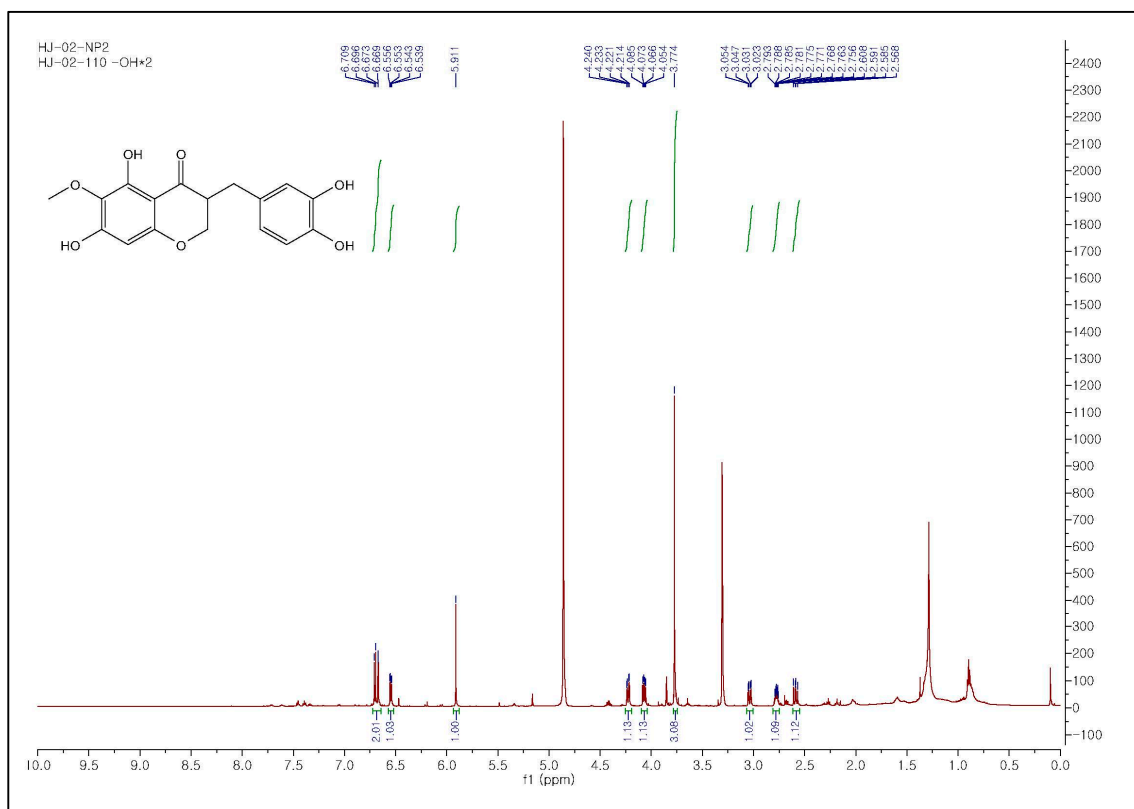Figure S23.  $^1\text{H-NMR}$  (600 MHz,  $\text{CD}_3\text{OD}$ ) of compound 3.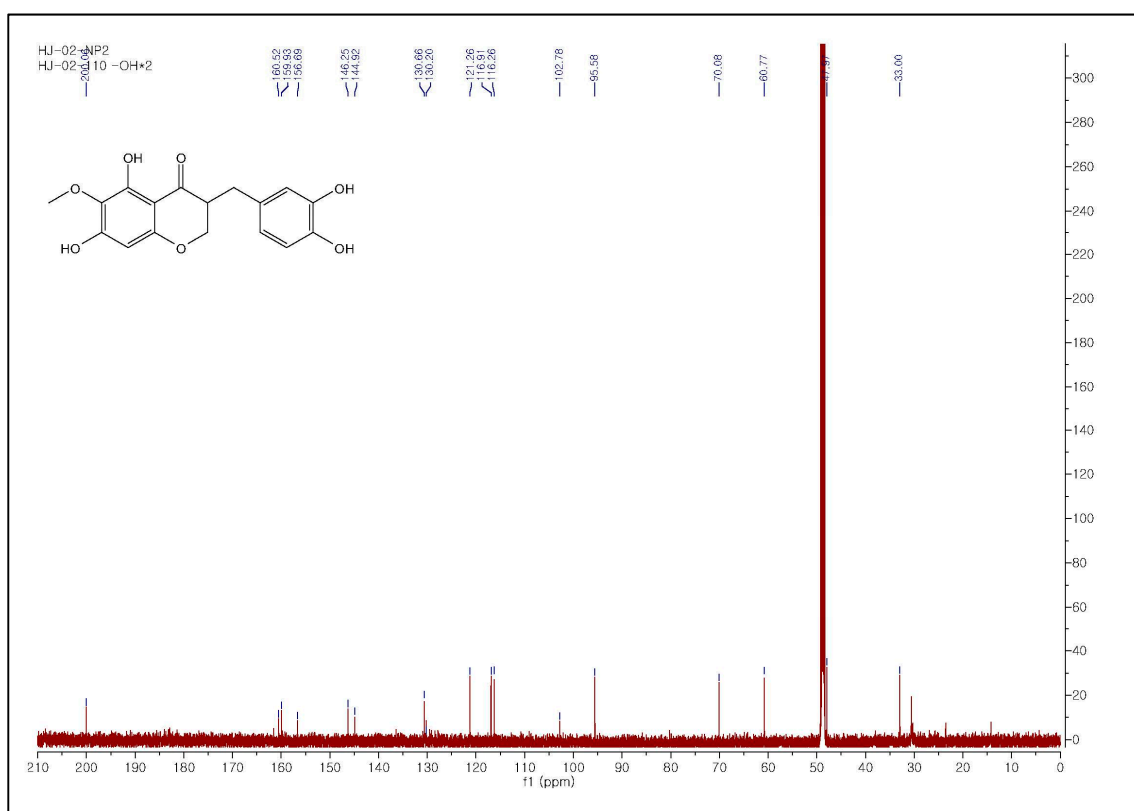Figure S24.  $^{13}\text{C-NMR}$  (150 MHz,  $\text{CD}_3\text{OD}$ ) of compound 3.



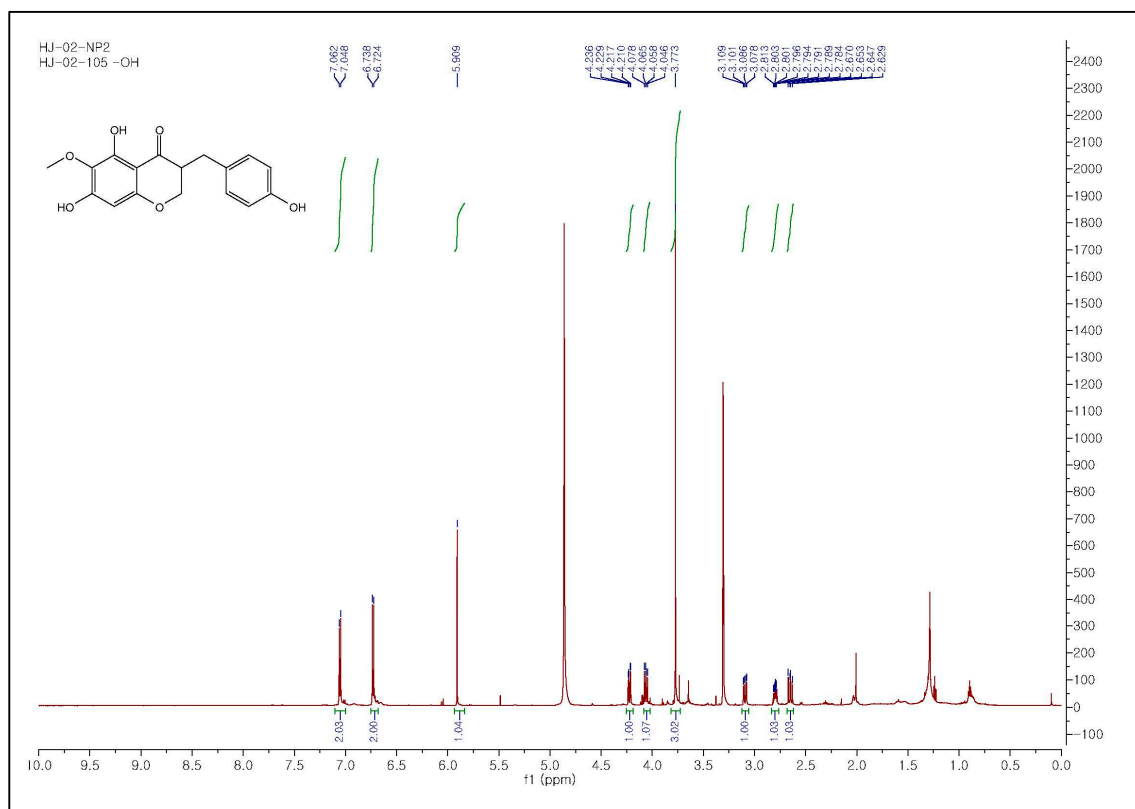Figure S25.  $^1\text{H-NMR}$  (600 MHz,  $\text{CD}_3\text{OD}$ ) of compound 4.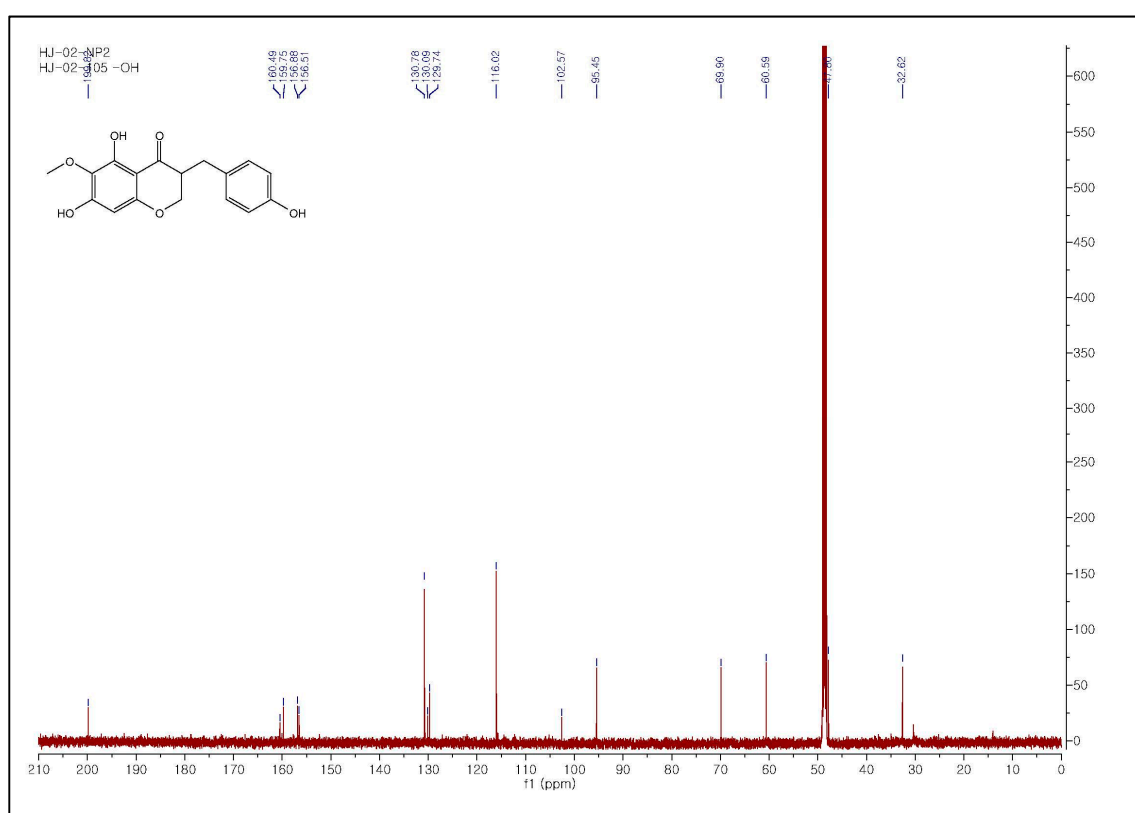Figure S26.  $^{13}\text{C-NMR}$  (150 MHz,  $\text{CD}_3\text{OD}$ ) of compound 4.

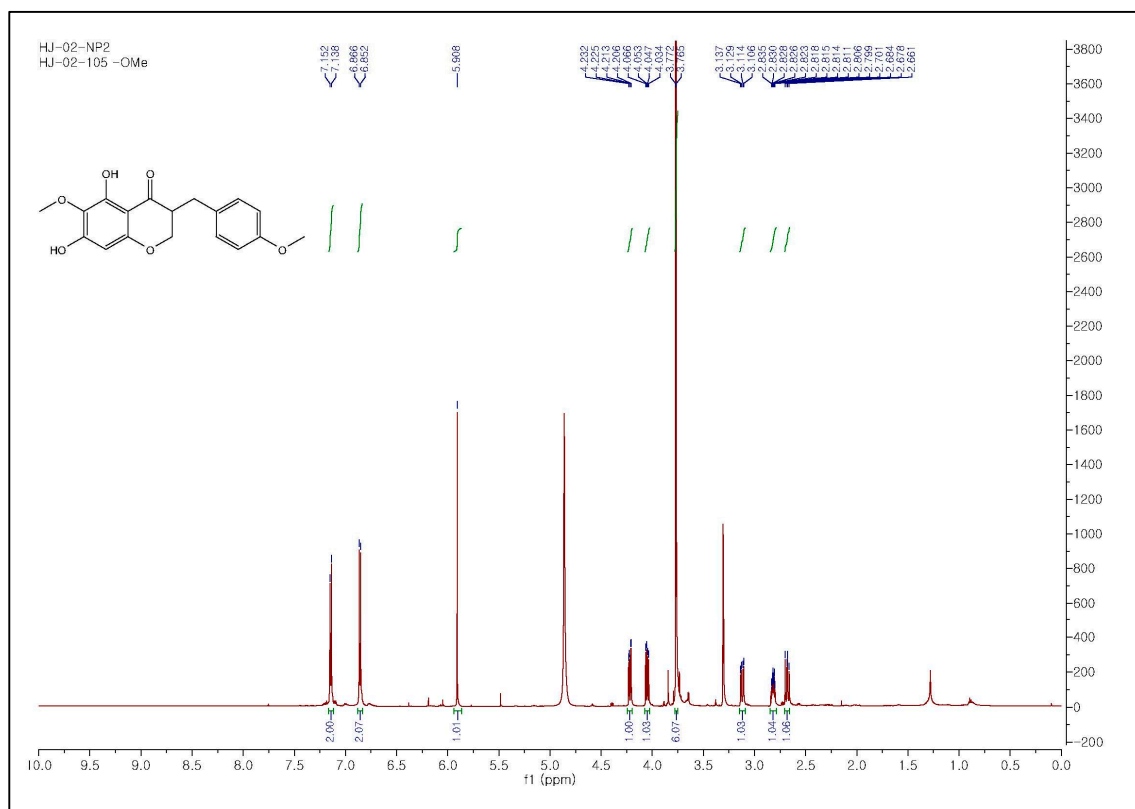Figure S27.  $^1\text{H-NMR}$  (600 MHz,  $\text{CD}_3\text{OD}$ ) of compound 5.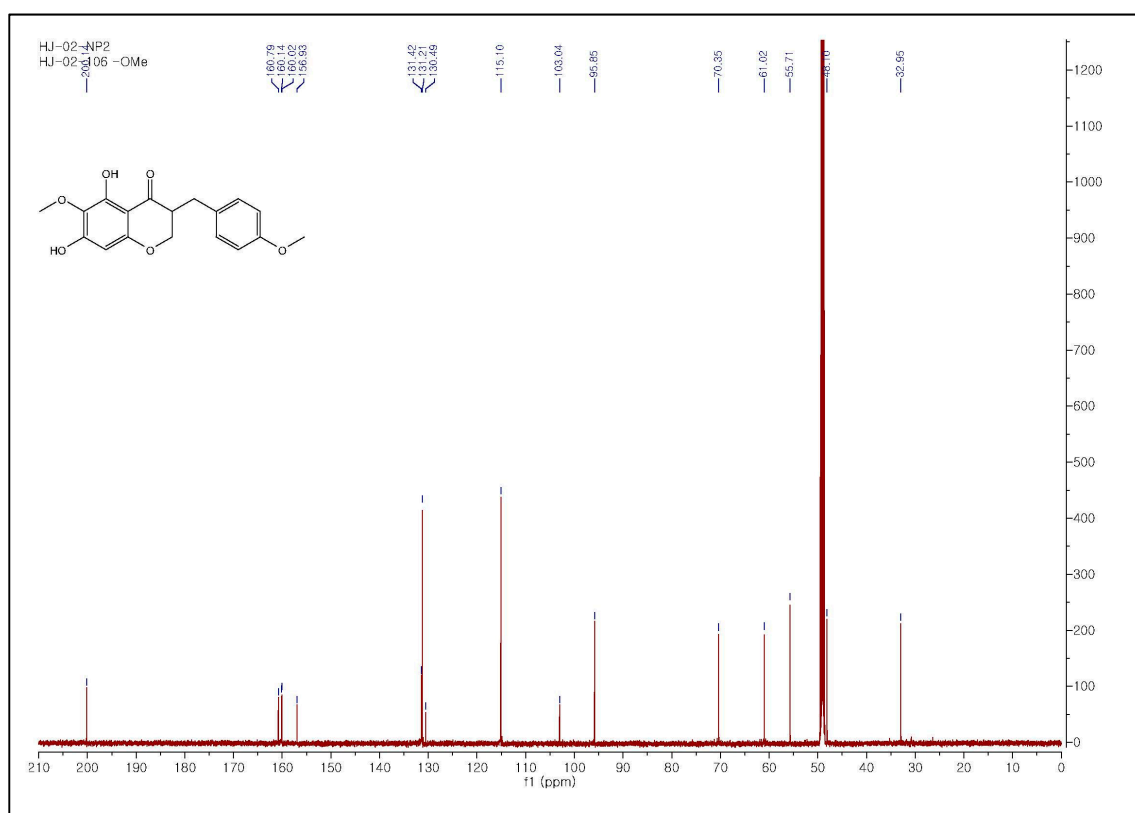Figure S28.  $^{13}\text{C-NMR}$  (150 MHz,  $\text{CD}_3\text{OD}$ ) of compound 5.

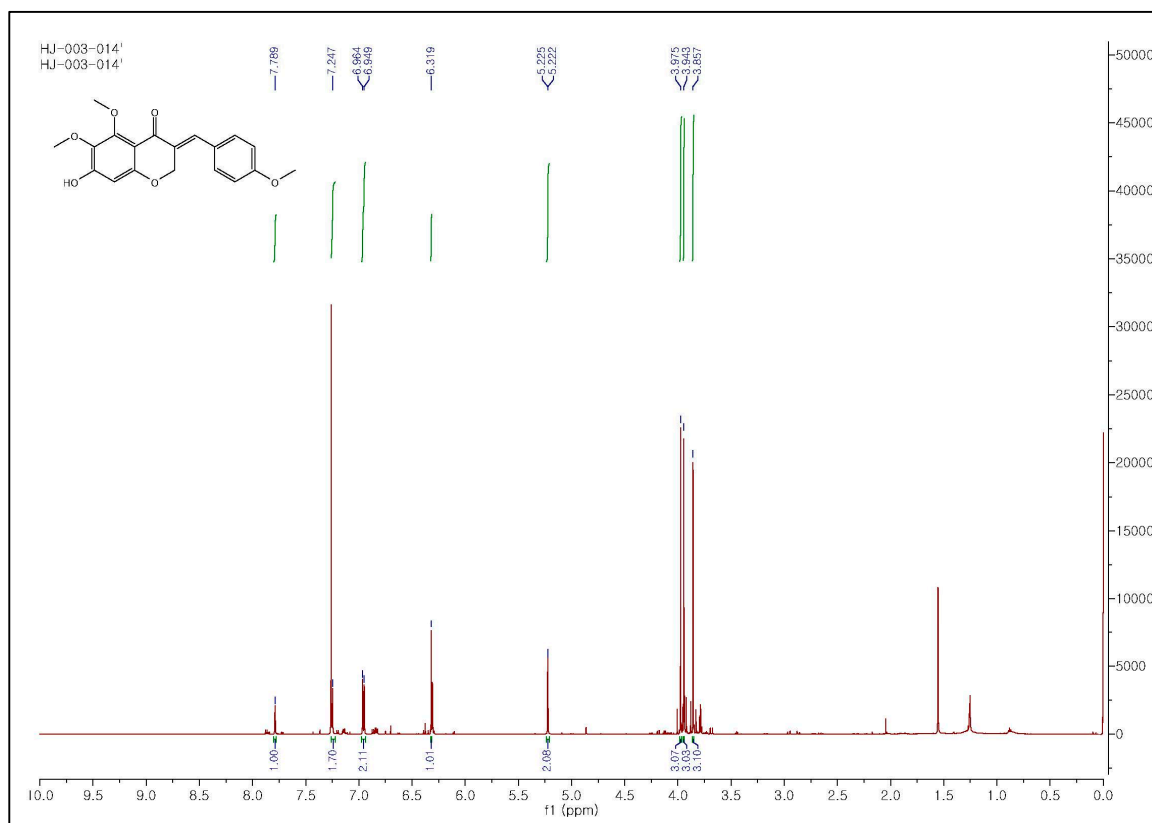Figure S29.  $^1\text{H-NMR}$  (600 MHz,  $\text{CDCl}_3$ ) of compound 19.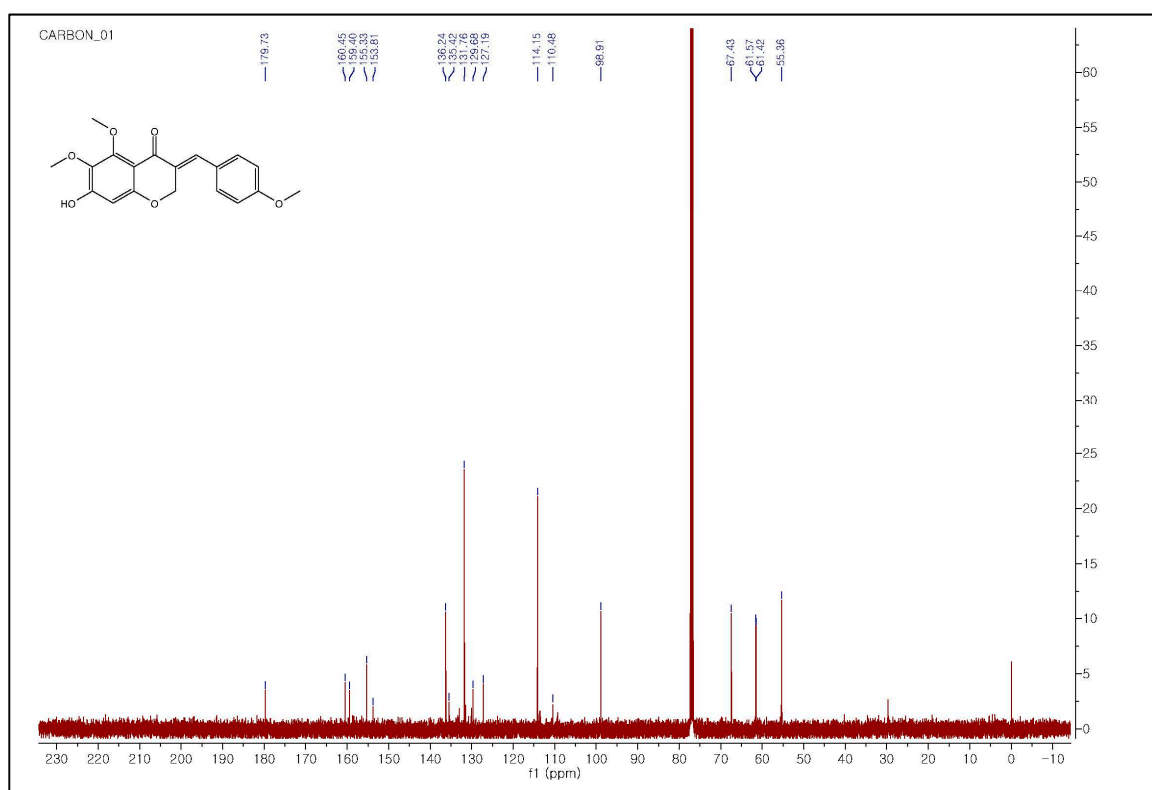Figure S30.  $^{13}\text{C-NMR}$  (100 MHz,  $\text{CDCl}_3$ ) of compound 19.

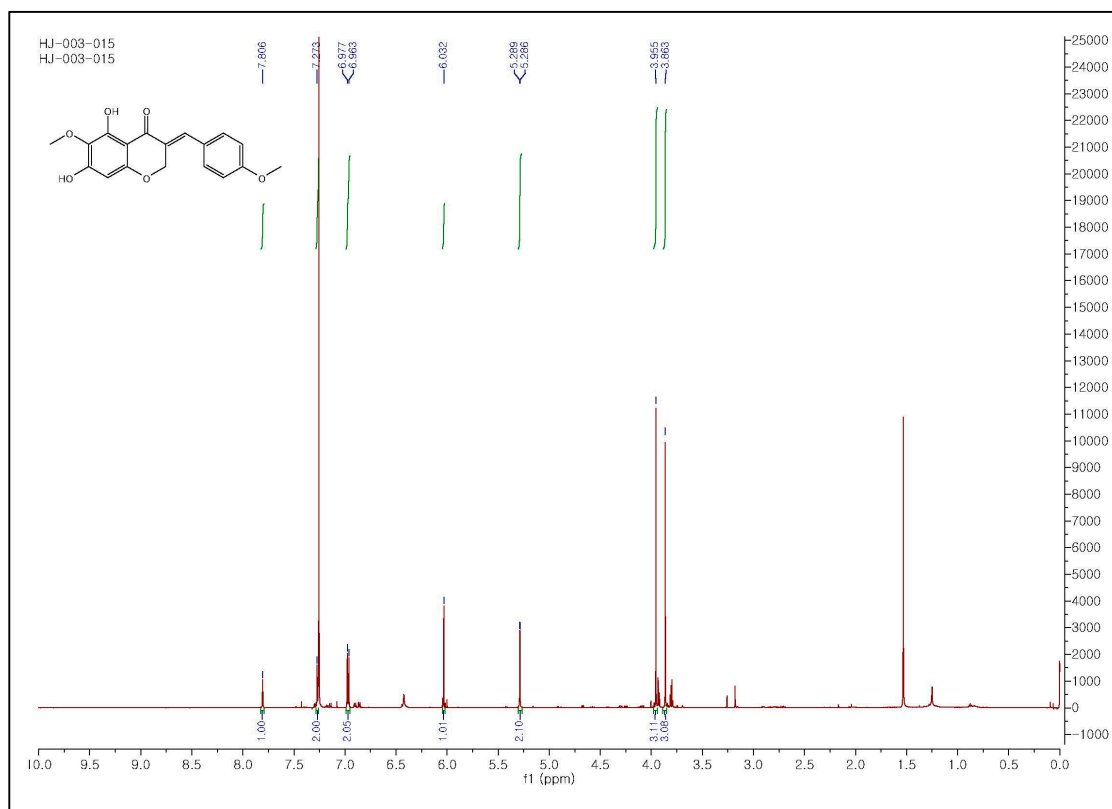Figure S31. <sup>1</sup>H-NMR (600 MHz, CDCl<sub>3</sub>) of compound 8.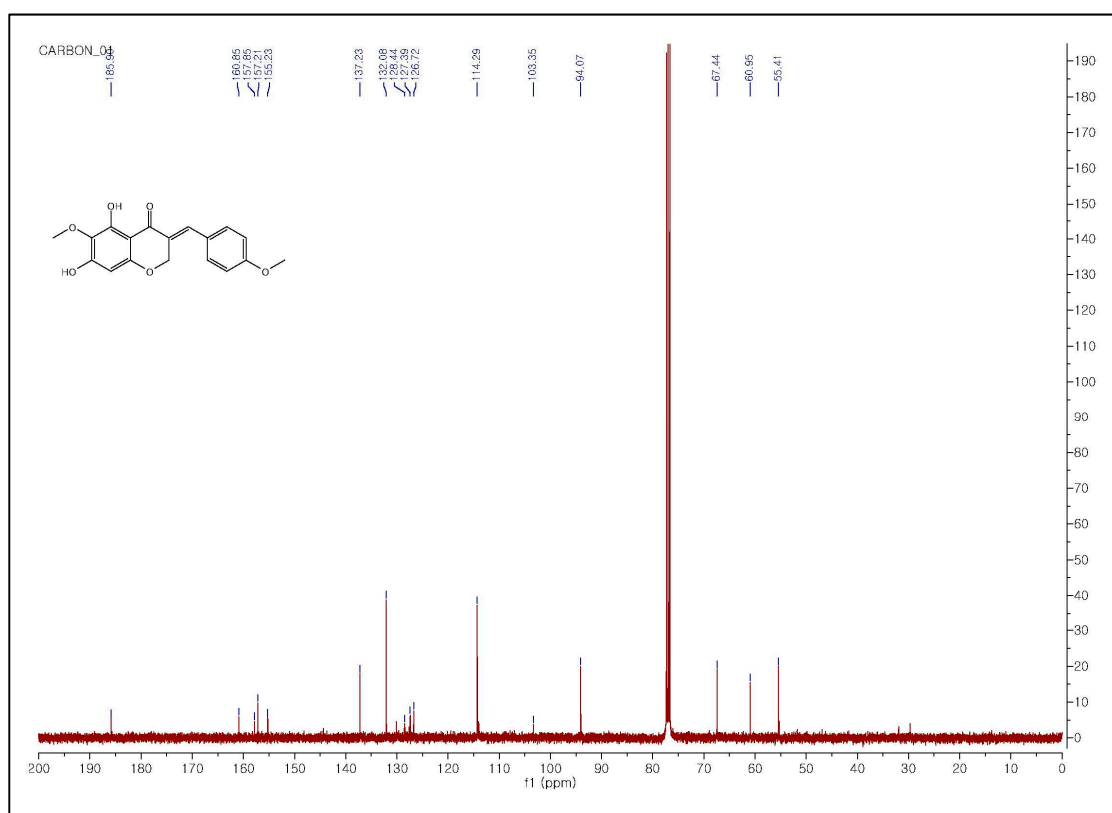Figure S32. <sup>13</sup>C-NMR (100 MHz, CDCl<sub>3</sub>) of compound 8.
